# Supplementary material
Source: PubMed Central journal article supplement (PMC5710525)
Supplement: jamaoncol-3-1327-s001.pdf [file jamaoncol-3-1327-s001.pdf]

## Supplementary Online Content

Cuzick J, Myers O, Lee JH, et al; New Mexico HPV Pap Registry Steering Committee. Outcomes in women with cytology showing atypical squamous cells of undetermined significance with vs without human papillomavirus testing. *JAMA Oncol*. Published online June 22, 2017. doi:10.1001/jamaoncol.2017.1040

**eTable 1.** Cumulative 1, 3 and 5 Year Incidence of CIN1, CIN2, CIN2+ and CIN3+ and Median Time to Detection After an ASC-US Screening Cytology Result by Age, HPV Test and Follow-up Time

**eTable 2.** Relative Risks (and 95% CIs) of CIN1, CIN2, CIN2+ and CIN3+ at 1 and 5 Years After an ASC-US Screening Cytology Result by HPV Status (Positive vs Negative) Stratified by Age

**eTable 3.** Cumulative Incidence Rate of LEEP for Different Outcomes After an ASC-US Cytology Screening Result by Age, HPV Testing Status, and Follow-up Time

**eTable 4.** Estimated Percentage (Kaplan-Meier) of Women With 1 or More Biopsies (Biopsy Alone, ECC Alone or Both Together, Excluding LEEP) Within 5 Years After an ASC-US Cytology Screening Result by Age and HPV Testing Status

**eTable 5.** Kaplan-Meier Estimate of Proportion With No Follow-up Test (Pap, HPV, Biopsy, ECC or LEEP) Within 5 Years of an ASC-US Cytology Screening Test by Age and HPV Testing Status

**eFigure 1.** Cumulative Incidence of CIN1 After ASC-US by Age and Index HPV Test Status

**eFigure 2.** Cumulative Incidence of CIN2 After ASC-US by Age and Index HPV Test Status

**eFigure 3.** Cumulative Incidence of CIN2+ After ASC-US by Age and Index HPV Test Status

**eFigure 4.** Cumulative Incidence of CIN3+ After ASC-US by Age and Index HPV Test Status

**eFigure 5.** Cumulative Incidence of CIN1, CIN2 and CIN3+ After ASC-US by Index HPV Test Status for Women Aged 21-24 Years

**eFigure 6.** Cumulative Incidence of CIN1, CIN2 and CIN3+ After ASC-US by Index HPV Test Status for Women Aged 25-29 Years

This supplementary material has been provided by the authors to give readers additional information about their work.

**eTable 1. Cumulative 1, 3 and 5 year incidence of CIN1, CIN2, CIN2+ and CIN3+ and median time to detection after an ASCUS screening cytology result by age, HPV test and follow up time.**

| Outcome | Age(y)     | Index HPV status | N<br>(all<br>outcomes) | Follow-up Time      |                     |                     | Median (95% CI)<br>time to detection<br>(days) |
|---------|------------|------------------|------------------------|---------------------|---------------------|---------------------|------------------------------------------------|
|         |            |                  |                        | 1 Year              | 3 Years             | 5 Years             |                                                |
|         |            |                  |                        | % (95% CI)          | % (95% CI)          | % (95% CI)          |                                                |
| CIN1    | 21-24      | All              | 4396                   | 11.49 (10.53-12.44) | 14.50 (13.42-15.57) | 15.46 (14.32-16.59) | 77 (69-91)                                     |
|         |            | All tested       | 3424                   | 13.43 (12.26-14.58) | 16.43 (15.14-17.70) | 17.10 (15.76-18.42) | 68 (63-74)                                     |
|         |            | HPV +            | 2349                   | 19.44 (17.79-21.06) | 23.00 (21.21-24.75) | 23.85 (21.98-25.67) | 65 (59-70)                                     |
|         |            | HPV -            | 1075                   | 0.93 (0.36-1.50)    | 2.91 (1.86-3.95)    | 3.43 (2.22-4.63)    | 591 (401-784)                                  |
|         |            | Not tested       | 972                    | 4.80 (3.43-6.14)    | 7.99 (6.20-9.74)    | 9.87 (7.75-11.94)   | 329 (274-403)                                  |
|         | 25-29      | All              | 4000                   | 10.90 (9.91-11.87)  | 13.43 (12.33-14.51) | 14.60 (13.43-15.75) | 76 (67-87)                                     |
|         |            | All tested       | 3214                   | 12.50 (11.33-13.66) | 15.02 (13.74-16.29) | 16.32 (14.96-17.67) | 68 (61-77)                                     |
|         |            | HPV +            | 1860                   | 21.45 (19.50-23.36) | 24.62 (22.53-26.64) | 25.93 (23.75-28.04) | 63 (56-69)                                     |
|         |            | HPV -            | 1354                   | 0.96 (0.44-1.48)    | 2.83 (1.91-3.74)    | 4.06 (2.89-5.22)    | 685.5 (450-871)                                |
|         |            | Not tested       | 786                    | 4.51 (3.04-5.96)    | 7.09 (5.23-8.92)    | 7.72 (5.73-9.66)    | 277 (186-386)                                  |
|         | 21-29      | All              | 8396                   | 11.20 (10.51-11.88) | 13.97 (13.21-14.73) | 15.05 (14.24-15.86) | 76.5 (70-84)                                   |
|         |            | All tested       | 6638                   | 12.96 (12.14-13.78) | 15.73 (14.82-16.63) | 16.73 (15.78-17.67) | 68 (63-73)                                     |
|         |            | HPV +            | 4209                   | 20.29 (19.04-21.53) | 23.67 (22.32-25.00) | 24.75 (23.34-26.14) | 63 (59-68)                                     |
|         |            | HPV -            | 2429                   | 0.91 (0.53-1.28)    | 2.81 (2.13-3.49)    | 3.79 (2.94-4.63)    | 630 (482-781)                                  |
|         |            | Not tested       | 1758                   | 4.67 (3.67-5.66)    | 7.59 (6.30-8.86)    | 8.86 (7.40-10.29)   | 305 (257-380)                                  |
|         | 30-39      | All              | 4817                   | 7.77 (7.00-8.54)    | 9.89 (9.02-10.75)   | 11.06 (10.11-12.01) | 82.5 (69-98)                                   |
|         |            | All tested       | 3945                   | 8.74 (7.84-9.63)    | 10.65 (9.66-11.64)  | 11.91 (10.82-12.99) | 69 (59-83)                                     |
|         |            | HPV +            | 1555                   | 21.49 (19.34-23.58) | 25.02 (22.71-27.26) | 26.47 (24.04-28.83) | 60 (55-69)                                     |
|         |            | HPV -            | 2390                   | 1.01 (0.61-1.41)    | 2.05 (1.46-2.64)    | 3.17 (2.36-3.97)    | 544 (368-826)                                  |
|         |            | Not tested       | 872                    | 3.60 (2.34-4.83)    | 6.48 (4.79-8.14)    | 7.22 (5.39-9.01)    | 361 (225-445)                                  |
| 40-49   | All        | 4096             | 4.73 (4.08-5.39)       | 6.20 (5.43-6.95)    | 6.61 (5.80-7.41)    | 77.5 (62-101)       |                                                |
|         | All tested | 3340             | 5.11 (4.35-5.86)       | 6.60 (5.72-7.46)    | 7.10 (6.17-8.02)    | 63 (56-88)          |                                                |

| Outcome | Age(y) | Index HPV status | N<br>(all<br>outcomes) | Follow-up Time      |                     |                     | Median (95% CI)<br>time to detection<br>(days) |
|---------|--------|------------------|------------------------|---------------------|---------------------|---------------------|------------------------------------------------|
|         |        |                  |                        | 1 Year              | 3 Years             | 5 Years             |                                                |
|         |        |                  |                        | % (95% CI)          | % (95% CI)          | % (95% CI)          |                                                |
|         |        | HPV +            | 802                    | 19.44 (16.56-22.22) | 22.82 (19.70-25.82) | 23.18 (19.99-26.24) | 55 (49-59)                                     |
|         |        | HPV -            | 2538                   | 0.84 (0.48-1.20)    | 1.77 (1.23-2.31)    | 2.32 (1.65-2.98)    | 561.5 (344-833)                                |
|         |        | Not tested       | 756                    | 3.08 (1.83-4.31)    | 4.44 (2.92-5.93)    | 4.95 (3.13-6.75)    | 207 (113-355)                                  |
|         | 50-64  | All              | 3368                   | 2.89 (2.32-3.45)    | 3.91 (3.24-4.58)    | 4.41 (3.67-5.15)    | 72 (56-197)                                    |
|         |        | All tested       | 2725                   | 3.30 (2.62-3.97)    | 4.40 (3.61-5.19)    | 4.91 (4.05-5.77)    | 62 (52-99)                                     |
|         |        | HPV +            | 613                    | 12.74 (10.02-15.37) | 15.82 (12.75-18.77) | 17.41 (14.06-20.62) | 54.5 (47-71)                                   |
|         |        | HPV -            | 2112                   | 0.67 (0.32-1.02)    | 1.21 (0.73-1.70)    | 1.60 (0.97-2.23)    | 437.5 (142-840)                                |
|         |        | Not tested       | 643                    | 1.12 (0.29-1.94)    | 1.81 (0.74-2.87)    | 2.27 (1.03-3.49)    | 327 (191-908)                                  |
|         | 30-64  | All              | 12281                  | 5.41 (5.00-5.81)    | 6.98 (6.52-7.44)    | 7.69 (7.19-8.18)    | 79 (69-91)                                     |
|         |        | All tested       | 10010                  | 6.02 (5.55-6.49)    | 7.57 (7.03-8.10)    | 8.32 (7.74-8.89)    | 65 (60-78)                                     |
|         |        | HPV +            | 2970                   | 19.03 (17.56-20.48) | 22.42 (20.82-23.98) | 23.67 (21.99-25.31) | 57 (53-62)                                     |
|         |        | HPV -            | 7040                   | 0.82 (0.61-1.03)    | 1.68 (1.37-1.99)    | 2.30 (1.91-2.70)    | 492.5 (368-720)                                |
|         |        | Not tested       | 2271                   | 2.73 (2.05-3.40)    | 4.49 (3.61-5.36)    | 5.07 (4.07-6.06)    | 274.5 (224-373)                                |
|         | 21-64  | All              | 20677                  | 7.75 (7.38-8.11)    | 9.80 (9.38-10.22)   | 10.64 (10.20-11.09) | 77 (71-84)                                     |
|         |        | All tested       | 16648                  | 8.77 (8.33-9.20)    | 10.79 (10.30-11.27) | 11.63 (11.12-12.14) | 68 (63-71)                                     |
|         |        | HPV +            | 7179                   | 19.78 (18.83-20.73) | 23.14 (22.11-24.15) | 24.26 (23.19-25.32) | 61 (57-64)                                     |
|         |        | HPV -            | 9469                   | 0.84 (0.66-1.03)    | 1.96 (1.67-2.25)    | 2.66 (2.30-3.02)    | 581.5 (452-687)                                |
|         |        | Not tested       | 4029                   | 3.58 (3.00-4.15)    | 5.80 (5.05-6.54)    | 6.60 (5.78-7.41)    | 298 (257-355)                                  |
| CIN1+   | 21-24  | All              | 4396                   | 15.83 (14.75-16.91) | 20.62 (19.39-21.82) | 22.57 (21.25-23.86) | 94 (79-112)                                    |
|         |        | All tested       | 3424                   | 18.17 (16.86-19.45) | 22.83 (21.39-24.25) | 24.50 (22.98-26.00) | 72 (67-82)                                     |
|         |        | HPV +            | 2349                   | 26.05 (24.26-27.81) | 31.65 (29.71-33.53) | 33.51 (31.48-35.48) | 68 (63-76)                                     |
|         |        | HPV -            | 1075                   | 1.02 (0.42-1.62)    | 3.60 (2.43-4.75)    | 4.87 (3.41-6.31)    | 643 (443-811)                                  |
|         |        | Not tested       | 972                    | 7.72 (6.02-9.38)    | 12.94 (10.75-15.07) | 16.18 (13.52-18.76) | 337 (292-430)                                  |
|         | 25-29  | All              | 4000                   | 16.32 (15.17-17.46) | 20.50 (19.23-21.76) | 22.17 (20.83-23.49) | 82 (73-98)                                     |
|         |        | All tested       | 3214                   | 18.41 (17.06-19.74) | 22.45 (20.97-23.89) | 24.17 (22.62-25.68) | 70 (66-78)                                     |

| Outcome | Age(y) | Index HPV status | N<br>(all<br>outcomes) | Follow-up Time      |                     |                     | Median (95% CI)<br>time to detection<br>(days) |
|---------|--------|------------------|------------------------|---------------------|---------------------|---------------------|------------------------------------------------|
|         |        |                  |                        | 1 Year              | 3 Years             | 5 Years             |                                                |
|         |        |                  |                        | % (95% CI)          | % (95% CI)          | % (95% CI)          |                                                |
|         |        | HPV +            | 1860                   | 31.06 (28.92-33.13) | 36.26 (34.01-38.42) | 37.96 (35.65-40.18) | 67 (61-71)                                     |
|         |        | HPV -            | 1354                   | 1.11 (0.55-1.67)    | 3.56 (2.53-4.57)    | 5.22 (3.90-6.53)    | 743 (516-883)                                  |
|         |        | Not tested       | 786                    | 7.90 (5.99-9.77)    | 12.72 (10.31-15.06) | 13.98 (11.42-16.46) | 298 (250-386)                                  |
|         | 21-29  | All              | 8396                   | 16.05 (15.26-16.83) | 20.54 (19.66-21.41) | 22.37 (21.43-23.29) | 85 (78-99)                                     |
|         |        | All tested       | 6638                   | 18.27 (17.33-19.19) | 22.62 (21.60-23.63) | 24.33 (23.25-25.40) | 71 (68-77)                                     |
|         |        | HPV +            | 4209                   | 28.24 (26.87-29.59) | 33.65 (32.19-35.08) | 35.47 (33.95-36.95) | 68 (63-71)                                     |
|         |        | HPV -            | 2429                   | 1.03 (0.63-1.43)    | 3.52 (2.76-4.28)    | 5.07 (4.09-6.04)    | 707 (565-810)                                  |
|         |        | Not tested       | 1758                   | 7.74 (6.48-8.98)    | 12.76 (11.16-14.34) | 15.13 (13.29-16.93) | 323.5 (292-371)                                |
|         | 30-39  | All              | 4817                   | 11.60 (10.68-12.50) | 14.63 (13.61-15.64) | 16.52 (15.41-17.62) | 83.5 (70-97)                                   |
|         |        | All tested       | 3945                   | 13.00 (11.94-14.04) | 15.77 (14.61-16.91) | 17.75 (16.48-19.00) | 69 (63-83)                                     |
|         |        | HPV +            | 1555                   | 31.41 (29.06-33.68) | 36.40 (33.93-38.78) | 39.07 (36.47-41.56) | 63 (57-69)                                     |
|         |        | HPV -            | 2390                   | 1.05 (0.64-1.46)    | 2.41 (1.77-3.04)    | 3.92 (3.02-4.81)    | 679 (435-844)                                  |
|         |        | Not tested       | 872                    | 5.39 (3.88-6.88)    | 9.50 (7.49-11.47)   | 10.88 (8.68-13.03)  | 315 (225-447)                                  |
|         | 40-49  | All              | 4096                   | 6.88 (6.10-7.65)    | 9.00 (8.10-9.90)    | 9.87 (8.90-10.84)   | 83 (68-110)                                    |
|         |        | All tested       | 3340                   | 7.47 (6.57-8.36)    | 9.64 (8.61-10.66)   | 10.45 (9.35-11.54)  | 69 (58-88)                                     |
|         |        | HPV +            | 802                    | 28.17 (24.97-31.23) | 33.44 (30.02-36.69) | 34.34 (30.85-37.66) | 57 (52-63)                                     |
|         |        | HPV -            | 2538                   | 0.92 (0.55-1.30)    | 2.12 (1.53-2.71)    | 2.91 (2.17-3.65)    | 662 (365-853)                                  |
|         |        | Not tested       | 756                    | 4.27 (2.81-5.71)    | 6.20 (4.42-7.94)    | 7.36 (5.31-9.37)    | 296.5 (188-436)                                |
|         | 50-64  | All              | 3368                   | 4.16 (3.48-4.84)    | 5.54 (4.74-6.32)    | 6.36 (5.48-7.23)    | 94 (70-204)                                    |
|         |        | All tested       | 2725                   | 4.47 (3.69-5.25)    | 5.84 (4.94-6.73)    | 6.65 (5.65-7.64)    | 75.5 (60-113)                                  |
|         |        | HPV +            | 613                    | 17.77 (14.67-20.75) | 21.38 (18.00-24.63) | 23.32 (19.68-26.78) | 63 (52-77)                                     |
|         |        | HPV -            | 2112                   | 0.67 (0.32-1.02)    | 1.37 (0.85-1.88)    | 1.87 (1.22-2.52)    | 466 (232-954)                                  |
|         |        | Not tested       | 643                    | 2.85 (1.54-4.13)    | 4.43 (2.77-6.05)    | 5.09 (3.28-6.86)    | 306 (215-561)                                  |
|         | 30-64  | All              | 12281                  | 7.98 (7.50-8.46)    | 10.25 (9.70-10.79)  | 11.48 (10.88-12.07) | 84 (75-95)                                     |
|         |        | All tested       | 10010                  | 8.82 (8.27-9.38)    | 11.00 (10.38-11.62) | 12.24 (11.56-12.91) | 70 (64-79)                                     |

| Outcome | Age(y) | Index HPV status | N<br>(all<br>outcomes) | Follow-up Time      |                     |                     | Median (95% CI)<br>time to detection<br>(days) |
|---------|--------|------------------|------------------------|---------------------|---------------------|---------------------|------------------------------------------------|
|         |        |                  |                        | 1 Year              | 3 Years             | 5 Years             |                                                |
|         |        |                  |                        | % (95% CI)          | % (95% CI)          | % (95% CI)          |                                                |
|         |        | HPV +            | 2970                   | 27.73 (26.09-29.33) | 32.43 (30.69-34.12) | 34.57 (32.75-36.34) | 61 (57-64)                                     |
|         |        | HPV -            | 7040                   | 0.86 (0.64-1.08)    | 1.97 (1.63-2.31)    | 2.90 (2.46-3.34)    | 655.5 (456-782)                                |
|         |        | Not tested       | 2271                   | 4.26 (3.42-5.09)    | 6.92 (5.84-7.98)    | 8.07 (6.87-9.25)    | 296.5 (240-375)                                |
|         | 21-64  | All              | 20677                  | 11.27 (10.84-11.70) | 14.45 (13.96-14.94) | 15.91 (15.38-16.43) | 84.5 (80-94)                                   |
|         |        | All tested       | 16648                  | 12.61 (12.10-13.11) | 15.66 (15.10-16.22) | 17.08 (16.48-17.67) | 71 (68-76)                                     |
|         |        | HPV +            | 7179                   | 28.02 (26.97-29.05) | 33.15 (32.04-34.24) | 35.10 (33.94-36.24) | 64 (62-68)                                     |
|         |        | HPV -            | 9469                   | 0.89 (0.70-1.08)    | 2.38 (2.06-2.70)    | 3.44 (3.02-3.85)    | 668.5 (551-777)                                |
|         |        | Not tested       | 4029                   | 5.76 (5.04-6.48)    | 9.44 (8.52-10.36)   | 11.14 (10.09-12.18) | 319 (282-358)                                  |
| CIN2    | 21-24  | All              | 4396                   | 3.62 (3.06-4.17)    | 5.15 (4.48-5.81)    | 5.90 (5.15-6.63)    | 182.5 (108-275)                                |
|         |        | All tested       | 3424                   | 4.03 (3.37-4.69)    | 5.56 (4.77-6.34)    | 6.28 (5.41-7.14)    | 106.5 (76-246)                                 |
|         |        | HPV +            | 2349                   | 5.85 (4.89-6.80)    | 7.91 (6.78-9.02)    | 8.69 (7.48-9.89)    | 92 (66-150)                                    |
|         |        | HPV -            | 1075                   | 0.19 (0.00-0.45)    | 0.61 (0.12-1.11)    | 1.10 (0.36-1.84)    | 986 (413-1667)                                 |
|         |        | Not tested       | 972                    | 2.27 (1.33-3.21)    | 3.87 (2.59-5.13)    | 4.94 (3.30-6.55)    | 333.5 (275-565)                                |
|         | 25-29  | All              | 4000                   | 4.32 (3.69-4.95)    | 5.84 (5.10-6.58)    | 6.15 (5.37-6.92)    | 123.5 (77-186)                                 |
|         |        | All tested       | 3214                   | 4.82 (4.07-5.56)    | 6.29 (5.43-7.14)    | 6.54 (5.66-7.42)    | 77 (69-118)                                    |
|         |        | HPV +            | 1860                   | 8.33 (7.05-9.59)    | 10.54 (9.10-11.96)  | 11.18 (9.53-12.80)  | 73 (65-99)                                     |
|         |        | HPV -            | 1354                   | 0.15 (0.00-0.36)    | 0.58 (0.15-1.01)    | 0.83 (0.28-1.38)    | 889 (469-1531)                                 |
|         |        | Not tested       | 786                    | 2.44 (1.35-3.52)    | 4.17 (2.72-5.60)    | 4.52 (2.99-6.02)    | 360 (279-552)                                  |
|         | 21-29  | All              | 8396                   | 3.94 (3.52-4.36)    | 5.46 (4.96-5.96)    | 6.01 (5.47-6.54)    | 149.5 (105-223)                                |
|         |        | All tested       | 6638                   | 4.39 (3.90-4.89)    | 5.89 (5.31-6.47)    | 6.40 (5.79-7.02)    | 85 (72-123)                                    |
|         |        | HPV +            | 4209                   | 6.92 (6.14-7.69)    | 9.03 (8.14-9.92)    | 9.61 (8.68-10.54)   | 78.5 (69-105)                                  |
|         |        | HPV -            | 2429                   | 0.12 (0.00-0.26)    | 0.60 (0.27-0.92)    | 0.95 (0.50-1.40)    | 889 (558-1531)                                 |
|         |        | Not tested       | 1758                   | 2.29 (1.59-2.99)    | 3.92 (2.98-4.86)    | 4.73 (3.61-5.84)    | 340 (282-471)                                  |
|         | 30-39  | All              | 4817                   | 2.68 (2.22-3.14)    | 3.39 (2.87-3.91)    | 4.00 (3.41-4.59)    | 127 (87-209)                                   |
|         |        | All tested       | 3945                   | 2.99 (2.46-3.53)    | 3.63 (3.03-4.23)    | 4.18 (3.51-4.85)    | 98 (66-155)                                    |

| Outcome | Age(y) | Index HPV status | N (all outcomes) | Follow-up Time       |                       |                       | Median (95% CI) time to detection (days) |
|---------|--------|------------------|------------------|----------------------|-----------------------|-----------------------|------------------------------------------|
|         |        |                  |                  | 1 Year<br>% (95% CI) | 3 Years<br>% (95% CI) | 5 Years<br>% (95% CI) |                                          |
|         |        | HPV +            | 1555             | 7.59 (6.24-8.92)     | 8.98 (7.50-10.43)     | 9.73 (8.16-11.27)     | 84 (60-110)                              |
|         |        | HPV -            | 2390             | 0.09 (0.00-0.20)     | 0.33 (0.08-0.57)      | 0.70 (0.29-1.12)      | 1241.5 (519-1828)                        |
|         |        | Not tested       | 872              | 1.39 (0.60-2.16)     | 2.30 (1.27-3.32)      | 3.16 (1.89-4.41)      | 468.5 (222-945)                          |
|         | 40-49  | All              | 4096             | 1.69 (1.29-2.08)     | 2.31 (1.84-2.79)      | 2.73 (2.19-3.27)      | 108.5 (66-252)                           |
|         |        | All tested       | 3340             | 1.89 (1.42-2.35)     | 2.55 (2.00-3.10)      | 2.91 (2.30-3.52)      | 79 (58-204)                              |
|         |        | HPV +            | 802              | 7.84 (5.93-9.71)     | 10.42 (8.19-12.59)    | 11.48 (9.02-13.87)    | 70.5 (57-146)                            |
|         |        | HPV -            | 2538             | 0.04 (0.00-0.12)     | 0.19 (0.00-0.37)      | 0.31 (0.06-0.56)      | 1000 (219-1550)                          |
|         |        | Not tested       | 756              | 0.81 (0.16-1.45)     | 1.45 (0.55-2.35)      | 1.97 (0.81-3.12)      | 527 (252-1217)                           |
|         | 50-64  | All              | 3368             | 0.87 (0.56-1.19)     | 1.11 (0.75-1.48)      | 1.23 (0.80-1.66)      | 106 (75-194)                             |
|         |        | All tested       | 2725             | 0.82 (0.48-1.16)     | 0.99 (0.61-1.37)      | 1.14 (0.66-1.61)      | 93 (69-194)                              |
|         |        | HPV +            | 613              | 3.69 (2.17-5.20)     | 4.33 (2.65-5.98)      | 5.04 (2.85-7.18)      | 88.5 (65-191)                            |
|         |        | HPV -            | 2112             | 0.05 (0.00-0.15)     | 0.05 (0.00-0.15)      | 0.05 (0.00-0.15)      | 454 (65-191)                             |
|         |        | Not tested       | 643              | 1.26 (0.39-2.13)     | 1.63 (0.62-2.63)      | 1.63 (0.62-2.63)      | 188 (56-718)                             |
|         | 30-64  | All              | 12281            | 1.84 (1.60-2.08)     | 2.39 (2.12-2.67)      | 2.78 (2.47-3.09)      | 117.5 (89-175)                           |
|         |        | All tested       | 10010            | 2.02 (1.74-2.30)     | 2.54 (2.22-2.85)      | 2.88 (2.53-3.23)      | 94.5 (71-124)                            |
|         |        | HPV +            | 2970             | 6.81 (5.89-7.73)     | 8.30 (7.27-9.32)      | 9.07 (7.96-10.17)     | 75 (65-99)                               |
|         |        | HPV -            | 7040             | 0.04 (0.00-0.09)     | 0.17 (0.07-0.28)      | 0.36 (0.19-0.53)      | 1001 (519-1492)                          |
|         |        | Not tested       | 2271             | 1.11 (0.68-1.55)     | 1.77 (1.21-2.33)      | 2.32 (1.64-3.00)      | 323 (228-718)                            |
|         | 21-64  | All              | 20677            | 2.70 (2.48-2.92)     | 3.65 (3.38-3.91)      | 4.10 (3.81-4.38)      | 134 (103-175)                            |
|         |        | All tested       | 16648            | 2.96 (2.70-3.22)     | 3.88 (3.58-4.18)      | 4.29 (3.97-4.62)      | 91 (76-109)                              |
|         |        | HPV +            | 7179             | 6.87 (6.28-7.46)     | 8.72 (8.05-9.39)      | 9.39 (8.68-10.10)     | 78 (69-96)                               |
|         |        | HPV -            | 9469             | 0.05 (0.01-0.10)     | 0.28 (0.17-0.40)      | 0.52 (0.34-0.69)      | 986 (707-1287)                           |
|         |        | Not tested       | 4029             | 1.63 (1.24-2.02)     | 2.71 (2.19-3.22)      | 3.37 (2.75-3.99)      | 340 (281-464)                            |
| CIN2+   | 21-24  | All              | 4396             | 4.73 (4.10-5.36)     | 7.13 (6.35-7.90)      | 8.41 (7.52-9.29)      | 237.5 (174-295)                          |

| Outcome | Age(y) | Index HPV status | N (all outcomes) | Follow-up Time      |                     |                     | Median (95% CI) time to detection (days) |
|---------|--------|------------------|------------------|---------------------|---------------------|---------------------|------------------------------------------|
|         |        |                  |                  | 1 Year              | 3 Years             | 5 Years             |                                          |
|         |        |                  |                  | % (95% CI)          | % (95% CI)          | % (95% CI)          |                                          |
|         |        | All tested       | 3424             | 5.23 (4.48-5.97)    | 7.46 (6.55-8.35)    | 8.69 (7.67-9.70)    | 139.5 (88-250)                           |
|         |        | HPV +            | 2349             | 7.58 (6.51-8.65)    | 10.46 (9.18-11.71)  | 11.98 (10.56-13.38) | 110.5 (78-219)                           |
|         |        | HPV -            | 1075             | 0.19 (0.00-0.45)    | 0.92 (0.32-1.52)    | 1.55 (0.69-2.40)    | 870 (413-1587)                           |
|         |        | Not tested       | 972              | 3.09 (1.99-4.17)    | 6.12 (4.55-7.67)    | 7.79 (5.81-9.74)    | 461 (314-565)                            |
|         | 25-29  | All              | 4000             | 5.84 (5.11-6.57)    | 8.04 (7.18-8.89)    | 8.65 (7.74-9.54)    | 137 (85-212)                             |
|         |        | All tested       | 3214             | 6.43 (5.57-7.27)    | 8.59 (7.61-9.57)    | 9.13 (8.11-10.15)   | 84 (70-128)                              |
|         |        | HPV +            | 1860             | 11.06 (9.62-12.48)  | 14.33 (12.70-15.93) | 15.21 (13.46-16.93) | 77 (69-106)                              |
|         |        | HPV -            | 1354             | 0.15 (0.00-0.35)    | 0.73 (0.25-1.21)    | 1.18 (0.53-1.83)    | 889 (469-1296)                           |
|         |        | Not tested       | 786              | 3.57 (2.27-4.86)    | 5.94 (4.24-7.62)    | 6.63 (4.81-8.42)    | 340 (280-426)                            |
|         | 21-29  | All              | 8396             | 5.25 (4.77-5.73)    | 7.54 (6.97-8.12)    | 8.51 (7.88-9.14)    | 184 (141-246)                            |
|         |        | All tested       | 6638             | 5.79 (5.23-6.36)    | 7.98 (7.32-8.64)    | 8.90 (8.18-9.62)    | 104 (82-150)                             |
|         |        | HPV +            | 4209             | 9.09 (8.22-9.96)    | 12.13 (11.13-13.13) | 13.28 (12.20-14.35) | 88 (76-123)                              |
|         |        | HPV -            | 2429             | 0.12 (0.00-0.26)    | 0.82 (0.44-1.19)    | 1.34 (0.82-1.87)    | 882 (558-1296)                           |
|         |        | Not tested       | 1758             | 3.25 (2.41-4.07)    | 5.95 (4.81-7.08)    | 7.24 (5.89-8.57)    | 367 (315-474)                            |
|         | 30-39  | All              | 4817             | 4.12 (3.55-4.68)    | 5.28 (4.64-5.92)    | 6.28 (5.55-7.01)    | 98 (71-146)                              |
|         |        | All tested       | 3945             | 4.62 (3.96-5.28)    | 5.76 (5.02-6.49)    | 6.71 (5.87-7.54)    | 84 (64-103)                              |
|         |        | HPV +            | 1555             | 11.67 (10.06-13.26) | 14.10 (12.32-15.84) | 15.77 (13.84-17.67) | 69 (61-92)                               |
|         |        | HPV -            | 2390             | 0.09 (0.00-0.20)    | 0.42 (0.14-0.69)    | 0.87 (0.41-1.32)    | 1196 (519-1656)                          |
|         |        | Not tested       | 872              | 1.95 (1.03-2.87)    | 3.13 (1.93-4.31)    | 4.33 (2.85-5.78)    | 447 (221-887)                            |
|         | 40-49  | All              | 4096             | 2.23 (1.77-2.68)    | 3.07 (2.53-3.61)    | 3.72 (3.09-4.35)    | 126 (75-249)                             |
|         |        | All tested       | 3340             | 2.46 (1.93-2.98)    | 3.36 (2.73-3.98)    | 3.90 (3.19-4.60)    | 94.5 (66-203)                            |
|         |        | HPV +            | 802              | 10.04 (7.91-12.12)  | 12.96 (10.53-15.32) | 14.56 (11.87-17.17) | 72.5 (58-119)                            |
|         |        | HPV -            | 2538             | 0.12 (0.00-0.26)    | 0.36 (0.11-0.61)    | 0.60 (0.26-0.94)    | 890.5 (408-1258)                         |
|         |        | Not tested       | 756              | 1.21 (0.42-1.99)    | 1.98 (0.94-3.01)    | 2.98 (1.54-4.40)    | 393 (252-1217)                           |
|         | 50-64  | All              | 3368             | 1.41 (1.01-1.81)    | 1.82 (1.36-2.28)    | 2.16 (1.63-2.68)    | 199 (90-285)                             |

| Outcome | Age(y) | Index HPV status | N (all outcomes) | Follow-up Time    |                     |                     | Median (95% CI) time to detection (days) |
|---------|--------|------------------|------------------|-------------------|---------------------|---------------------|------------------------------------------|
|         |        |                  |                  | 1 Year            | 3 Years             | 5 Years             |                                          |
|         |        |                  |                  | % (95% CI)        | % (95% CI)          | % (95% CI)          |                                          |
|         |        | All tested       | 2725             | 1.34 (0.90-1.77)  | 1.63 (1.14-2.11)    | 1.95 (1.39-2.51)    | 146.5 (77-283)                           |
|         |        | HPV +            | 613              | 5.63 (3.78-7.46)  | 6.60 (4.57-8.59)    | 7.80 (5.27-10.27)   | 88.5 (69-194)                            |
|         |        | HPV -            | 2112             | 0.10 (0.00-0.23)  | 0.21 (0.00-0.41)    | 0.47 (0.11-0.84)    | 1329 (400-1937)                          |
|         |        | Not tested       | 643              | 1.90 (0.83-2.95)  | 2.80 (1.48-4.11)    | 3.02 (1.63-4.40)    | 271.5 (90-718)                           |
|         | 30-64  | All              | 12281            | 2.74 (2.45-3.03)  | 3.58 (3.25-3.92)    | 4.30 (3.91-4.68)    | 108 (89-172)                             |
|         |        | All tested       | 10010            | 3.00 (2.66-3.33)  | 3.82 (3.44-4.20)    | 4.47 (4.04-4.91)    | 88.5 (71-110)                            |
|         |        | HPV +            | 2970             | 9.99 (8.90-11.07) | 12.20 (10.99-13.40) | 13.66 (12.34-14.96) | 74 (65-93)                               |
|         |        | HPV -            | 7040             | 0.07 (0.01-0.14)  | 0.31 (0.18-0.45)    | 0.65 (0.43-0.88)    | 1001 (707-1441)                          |
|         |        | Not tested       | 2271             | 1.60 (1.08-2.12)  | 2.60 (1.92-3.27)    | 3.50 (2.66-4.33)    | 353 (243-697)                            |
|         | 21-64  | All              | 20677            | 3.76 (3.50-4.02)  | 5.21 (4.90-5.51)    | 6.02 (5.67-6.36)    | 155 (119-196)                            |
|         |        | All tested       | 16648            | 4.12 (3.81-4.42)  | 5.50 (5.14-5.85)    | 6.25 (5.86-6.64)    | 96.5 (84-113)                            |
|         |        | HPV +            | 7179             | 9.46 (8.78-10.14) | 12.17 (11.39-12.93) | 13.44 (12.61-14.27) | 84 (72-97)                               |
|         |        | HPV -            | 9469             | 0.07 (0.02-0.13)  | 0.44 (0.30-0.58)    | 0.83 (0.62-1.05)    | 931 (747-1218)                           |
|         |        | Not tested       | 4029             | 2.32 (1.85-2.79)  | 4.03 (3.41-4.65)    | 5.13 (4.38-5.88)    | 360 (314-471)                            |
| CIN3+   | 21-24  | All              | 4396             | 1.55 (1.18-1.91)  | 2.71 (2.21-3.21)    | 3.35 (2.75-3.95)    | 292 (207-478)                            |
|         |        | All tested       | 3424             | 1.72 (1.28-2.16)  | 2.69 (2.12-3.25)    | 3.33 (2.65-4.00)    | 222.5 (79-423)                           |
|         |        | HPV +            | 2349             | 2.53 (1.88-3.17)  | 3.82 (3.00-4.62)    | 4.71 (3.74-5.68)    | 196 (76-309)                             |
|         |        | HPV -            | 1075             | 0.09 (0.00-0.28)  | 0.31 (0.00-0.66)    | 0.45 (0.00-0.90)    | 816.5 (400-1400)                         |
|         |        | Not tested       | 972              | 1.04 (0.40-1.68)  | 2.77 (1.69-3.84)    | 3.42 (2.12-4.71)    | 498.5 (352-661)                          |
|         | 25-29  | All              | 4000             | 2.05 (1.60-2.49)  | 3.00 (2.46-3.54)    | 3.42 (2.79-4.06)    | 209 (93-292)                             |
|         |        | All tested       | 3214             | 2.20 (1.69-2.71)  | 3.23 (2.59-3.85)    | 3.66 (2.92-4.39)    | 128 (77-286)                             |
|         |        | HPV +            | 1860             | 3.87 (2.97-4.76)  | 5.59 (4.49-6.68)    | 6.22 (4.94-7.48)    | 106 (73-260)                             |
|         |        | HPV -            | 1354             | 0.07 (0.00-0.22)  | 0.25 (0.00-0.54)    | 0.35 (0.00-0.70)    | 863.0 (380-1296)                         |
|         |        | Not tested       | 786              | 1.54 (0.67-2.41)  | 2.27 (1.19-3.33)    | 2.46 (1.32-3.58)    | 303.5 (137-426)                          |
|         | 21-29  | All              | 8396             | 1.78 (1.50-2.07)  | 2.83 (2.46-3.19)    | 3.32 (2.90-3.73)    | 236 (174-324)                            |
|         |        | All tested       | 6638             | 1.94 (1.60-2.27)  | 2.92 (2.50-3.34)    | 3.41 (2.93-3.88)    | 175 (88-285)                             |



| Outcome | Age(y) | Index HPV status | N (all outcomes) | Follow-up Time       |                       |                       | Median (95% CI) time to detection (days) |
|---------|--------|------------------|------------------|----------------------|-----------------------|-----------------------|------------------------------------------|
|         |        |                  |                  | 1 Year<br>% (95% CI) | 3 Years<br>% (95% CI) | 5 Years<br>% (95% CI) |                                          |
|         |        | HPV +            | 4209             | 3.09 (2.56-3.62)     | 4.56 (3.90-5.21)      | 5.24 (4.50-5.97)      | 138 (82-252)                             |
|         |        | HPV -            | 2429             | 0.04 (0.00-0.12)     | 0.28 (0.05-0.50)      | 0.40 (0.12-0.67)      | 816.5 (400-1400)                         |
|         |        | Not tested       | 1758             | 1.21 (0.69-1.72)     | 2.54 (1.78-3.30)      | 2.97 (2.10-3.84)      | 419 (292-527)                            |
|         | 30-39  | All              | 4817             | 1.69 (1.32-2.05)     | 2.29 (1.85-2.72)      | 2.71 (2.21-3.20)      | 80 (61-105)                              |
|         |        | All tested       | 3945             | 1.86 (1.43-2.28)     | 2.50 (2.00-3.00)      | 2.93 (2.37-3.50)      | 69 (57-99)                               |
|         |        | HPV +            | 1555             | 4.80 (3.71-5.88)     | 6.40 (5.12-7.66)      | 7.47 (6.01-8.90)      | 66 (54-92)                               |
|         |        | HPV -            | 2390             | 0.04 (0.00-0.13)     | 0.09 (0.00-0.21)      | 0.17 (0.00-0.36)      | 658 (435-1656)                           |
|         |        | Not tested       | 872              | 0.92 (0.28-1.55)     | 1.48 (0.64-2.32)      | 1.68 (0.75-2.60)      | 222 (51-890)                             |
|         | 40-49  | All              | 4096             | 0.85 (0.56-1.13)     | 1.13 (0.80-1.46)      | 1.37 (0.98-1.75)      | 119 (70-272)                             |
|         |        | All tested       | 3340             | 0.92 (0.59-1.24)     | 1.16 (0.79-1.54)      | 1.35 (0.93-1.77)      | 83 (47-211)                              |
|         |        | HPV +            | 802              | 3.66 (2.32-4.98)     | 4.46 (2.95-5.94)      | 4.89 (3.27-6.49)      | 70 (41-126)                              |
|         |        | HPV -            | 2538             | 0.08 (0.00-0.19)     | 0.23 (0.03-0.43)      | 0.29 (0.05-0.53)      | 764.5 (30-1521)                          |
|         |        | Not tested       | 756              | 0.67 (0.08-1.25)     | 1.15 (0.35-1.94)      | 1.46 (0.45-2.45)      | 371 (78-1731)                            |
|         | 50-64  | All              | 3368             | 0.60 (0.34-0.87)     | 0.81 (0.50-1.12)      | 1.12 (0.72-1.51)      | 300 (93-575)                             |
|         |        | All tested       | 2725             | 0.63 (0.33-0.94)     | 0.77 (0.43-1.11)      | 1.04 (0.61-1.47)      | 251 (77-473)                             |
|         |        | HPV +            | 613              | 2.53 (1.26-3.79)     | 2.96 (1.55-4.34)      | 3.24 (1.73-4.72)      | 88.5 (45-283)                            |
|         |        | HPV -            | 2112             | 0.10 (0.00-0.23)     | 0.16 (0.00-0.33)      | 0.42 (0.07-0.77)      | 1655 (313-1937)                          |
|         |        | Not tested       | 643              | 0.64 (0.01-1.26)     | 1.19 (0.31-2.07)      | 1.42 (0.43-2.39)      | 475 (258-1341)                           |
|         | 30-64  | All              | 12281            | 1.11 (0.92-1.30)     | 1.48 (1.26-1.70)      | 1.82 (1.57-2.08)      | 97 (77-222)                              |
|         |        | All tested       | 10010            | 1.19 (0.97-1.40)     | 1.57 (1.32-1.82)      | 1.89 (1.60-2.18)      | 84 (65-113)                              |
|         |        | HPV +            | 2970             | 4.02 (3.30-4.74)     | 5.11 (4.28-5.93)      | 5.90 (4.97-6.82)      | 70 (59-92)                               |
|         |        | HPV -            | 7040             | 0.04 (0.00-0.09)     | 0.14 (0.05-0.23)      | 0.29 (0.14-0.44)      | 892.5 (435-1656)                         |
|         |        | Not tested       | 2271             | 0.76 (0.40-1.12)     | 1.17 (0.71-1.62)      | 1.53 (0.97-2.08)      | 349 (222-812)                            |
|         | 21-64  | All              | 20677            | 1.38 (1.22-1.54)     | 2.02 (1.83-2.22)      | 2.43 (2.20-2.65)      | 208 (119-251)                            |

| Outcome | Age(y) | Index HPV status | N (all outcomes) | Follow-up Time       |                       |                       | Median (95% CI) time to detection (days) |
|---------|--------|------------------|------------------|----------------------|-----------------------|-----------------------|------------------------------------------|
|         |        |                  |                  | 1 Year<br>% (95% CI) | 3 Years<br>% (95% CI) | 5 Years<br>% (95% CI) |                                          |
|         |        | All tested       | 16648            | 1.49 (1.30-1.67)     | 2.10 (1.88-2.32)      | 2.49 (2.24-2.75)      | 103 (82-183)                             |
|         |        | HPV +            | 7179             | 3.48 (3.04-3.91)     | 4.77 (4.25-5.28)      | 5.51 (4.93-6.09)      | 87 (76-126)                              |
|         |        | HPV -            | 9469             | 0.03 (0.00-0.07)     | 0.16 (0.08-0.25)      | 0.32 (0.18-0.45)      | 820 (516-1400)                           |
|         |        | Not tested       | 4029             | 0.93 (0.63-1.23)     | 1.73 (1.32-2.15)      | 2.15 (1.66-2.64)      | 393 (279-523)                            |

**eTable 2. Relative risks and (95% CIs) of CIN1, CIN2, CIN2+ and CIN3+ at 1 and 5 years after an ASCUS screening cytology result by HPV status (positive versus negative) stratified by age. All p-values < 10<sup>-6</sup>.**

| Outcome | Age group | HPV positive versus HPV negative |                              |
|---------|-----------|----------------------------------|------------------------------|
|         |           | 1 Year<br>Rel risk (95% CI)      | 5 Years<br>Rel risk (95% CI) |
| CIN1    | 21-24     | 20.87 (11.20-38.87)              | 6.95 (5.02-9.62)             |
|         | 25-29     | 23.30 (12.90-38.54)              | 6.39 (4.87-8.37)             |
|         | 21-29     | 22.37 (14.70-34.05)              | 6.54 (5.31-8.04)             |
|         | 30-39     | 21.25 (14.13-31.95)              | 8.36 (6.60-10.59)            |
|         | 40-49     | 23.06 (14.78-35.99)              | 10.00 (7.54-13.26)           |
|         | 50-59     | 19.03 (10.88-33.30)              | 10.85 (7.45-15.80)           |
|         | 30-64     | 23.26 (17.80-30.40)              | 10.27 (8.71-12.12)           |
|         | 21-64     | 23.52 (18.81-29.41)              | 9.11 (8.01-10.36)            |
| CIN2    | 21-24     | 31.24 (7.79-125.38)              | 7.87 (4.40-14.07)            |
|         | 25-29     | 56.22 (13.91-219.14)             | 13.44 (7.41-24.38)           |
|         | 21-29     | 55.61 (17.92-172.57)             | 10.11 (6.67-15.34)           |
|         | 30-39     | 89.07 (22.33-355.36)             | 13.85 (8.40-22.83)           |
|         | 40-49     | 194.07 (27.62-1363.52)           | 37.36 (18.06-77.27)          |
|         | 50-64     | 74.45 (10.52-526.76)             | 101.65 (14.53-710.91)        |
|         | 30-64     | 156.42 (50.68-482.80)            | 25.03 (16.72-37.48)          |
|         | 21-64     | 128.52 (53.58-308.28)            | 18.24 (13.66-24.35)          |
| CIN2+   | 21-24     | 40.55 (10.12-162.53)             | 7.73 (4.74-12.61)            |
|         | 25-29     | 74.45 (18.60-297.94)             | 12.87 (7.82-21.19)           |
|         | 21-29     | 73.37 (23.63-227.80)             | 9.89 (6.97-14.03)            |
|         | 30-39     | 136.99 (34.48-544.29)            | 18.17 (11.66-28.32)          |
|         | 40-49     | 82.82 (26.60-257.88)             | 24.26 (14.31-41.13)          |
|         | 50-64     | 58.06 (14.23-236.92)             | 16.49 (8.39-32.40)           |
|         | 30-64     | 138.14 (57.58-331.39)            | 20.95 (15.48-28.33)          |
|         | 21-64     | 126.53 (60.39-265.12)            | 16.15 (12.86-20.28)          |
| CIN3+   | 21-24     | 26.89 (3.77-191.67)              | 10.46 (4.22-25.91)           |
|         | 25-29     | 81.78 (7.29-367.59)              | 17.63 (7.08-43.91)           |
|         | 21-29     | 74.35 (10.50-526.32)             | 13.22 (6.95-25.16)           |
|         | 30-39     | 110.43 (15.96-764.32)            | 44.81 (16.54-121.44)         |
|         | 40-49     | 45.25 (11.01-185.92)             | 16.65 (7.64-36.28)           |
|         | 50-64     | 26.11 (6.10-111.73)              | 7.64 (3.49-16.74)            |
|         | 30-64     | 92.54 (29.78-287.58)             | 20.27 (12.85-31.97)          |
|         | 21-64     | 108.14 (34.94-334.71)            | 17.29 (11.96-25.00)          |

**eTable 3. Cumulative incidence rate of LEEP for different outcomes after an ASCUS cytology screening result by age, HPV testing status and follow-up time**

| Outcome | Age (y)    | Index HPV status | n                | 1Y<br>% (95% CI) | 3Y<br>% (95% CI)  | 5Y<br>% (95% CI)   |
|---------|------------|------------------|------------------|------------------|-------------------|--------------------|
| <CIN1   | 21-24      | All              | 3455             | 0.03 (0.00-0.09) | 0.10 (0.00-0.22)  | 0.15 (0.00-0.31)   |
|         |            | HPV tested       | 2621             | 0.04 (0.00-0.12) | 0.14 (0.00-0.29)  | 0.20 (0.00-0.40)   |
|         |            | HPV +            | 1591             | 0.07 (0.00-0.19) | 0.23 (0.00-0.48)  | 0.33 (0.00-0.66)   |
|         |            | HPV -            | 1030             | (-)              | (-)               | (-)                |
|         |            | Not tested       | 834              | (-)              | (-)               | (-)                |
|         | 25-29      | All              | 3142             | 0.06 (0.00-0.15) | 0.17 (0.02-0.32)  | 0.21 (0.04-0.38)   |
|         |            | HPV tested       | 2460             | 0.04 (0.00-0.12) | 0.18 (0.00-0.35)  | 0.18 (0.00-0.35)   |
|         |            | HPV +            | 1169             | 0.09 (0.00-0.25) | 0.37 (0.01-0.74)  | 0.37 (0.01-0.74)   |
|         |            | HPV -            | 1291             | (-)              | (-)               | (-)                |
|         |            | Not tested       | 682              | 0.15 (0.00-0.43) | 0.33 (0.00-0.80)  | 0.33 (0.00-0.80)   |
|         | 21-29      | All              | 6597             | 0.03 (0.00-0.07) | 0.14 (0.04-0.23)  | 0.18 (0.07-0.29)   |
|         |            | HPV tested       | 5081             | 0.02 (0.00-0.06) | 0.16 (0.04-0.27)  | 0.19 (0.06-0.32)   |
|         |            | HPV +            | 2760             | 0.04 (0.00-0.11) | 0.29 (0.07-0.50)  | 0.35 (0.10-0.60)   |
|         |            | HPV -            | 2321             | 0.00 (-)         | 0.00 (-)          | 0.00 (-)           |
|         |            | Not tested       | 1516             | 0.07 (0.00-0.20) | 0.16 (0.00-0.38)  | 0.16 (0.00-0.38)   |
|         | 30-64      | All              | 10954            | 0.16 (0.08-0.23) | 0.28 (0.18-0.38)  | 0.35 (0.22-0.48)   |
|         |            | HPV tested       | 8853             | 0.17 (0.08-0.26) | 0.28 (0.17-0.39)  | 0.36 (0.21-0.51)   |
|         |            | HPV +            | 1989             | 0.70 (0.34-1.07) | 1.04 (0.59-1.50)  | 1.20 (0.69-1.71)   |
|         |            | HPV -            | 6864             | 0.03 (0.00-0.07) | 0.06 (0.00-0.12)  | 0.12 (0.00-0.24)   |
|         |            | Not tested       | 2101             | 0.10 (0.00-0.23) | 0.25 (0.03-0.47)  | 0.32 (0.06-0.59)   |
| 21-64   | All        | 17551            | 0.11 (0.06-0.16) | 0.22 (0.15-0.29) | 0.29 (0.20-0.38)  |                    |
|         | HPV tested | 13934            | 0.11 (0.06-0.17) | 0.24 (0.15-0.32) | 0.30 (0.19-0.40)  |                    |
|         | HPV +      | 4749             | 0.32 (0.16-0.48) | 0.60 (0.38-0.83) | 0.71 (0.45-0.96)  |                    |
|         | HPV -      | 9185             | 0.02 (0.00-0.05) | 0.05 (0.00-0.09) | 0.09 (0.00-0.18)  |                    |
|         | Not tested | 3617             | 0.08 (0.00-0.18) | 0.21 (0.05-0.37) | 0.26 (0.08-0.44)  |                    |
| CIN1    | 21-24      | All              | 632              | 1.27 (0.39-2.13) | 4.07 (2.46-5.65)  | 6.33 (3.65-8.93)   |
|         |            | HPV tested       | 549              | 1.09 (0.22-1.96) | 3.31 (1.75-4.86)  | 5.10 (2.36-7.76)   |
|         |            | HPV +            | 517              | 1.16 (0.23-2.08) | 3.33 (1.71-4.93)  | 5.03 (2.12-7.86)   |
|         |            | HPV -            | 32               | 3.12 (0.00-8.97) | 6.47 (0.00-14.75) | 6.47 (0.00-14.75)  |
|         |            | Not tested       | 83               | 2.41 (0.00-5.65) | 8.99 (2.39-15.14) | 14.24 (5.48-22.18) |
|         | 25-29      | All              | 542              | 3.87 (2.24-5.49) | 7.04 (4.82-9.21)  | 8.17 (5.54-10.73)  |
|         |            | HPV tested       | 486              | 3.91 (2.17-5.62) | 7.01 (4.67-9.29)  | 8.27 (5.44-11.01)  |
|         |            | HPV +            | 436              | 4.13 (2.24-5.98) | 7.37 (4.83-9.84)  | 9.20 (5.61-12.65)  |
|         |            | HPV -            | 50               | 2.00 (0.00-5.80) | 4.00 (0.00-9.28)  | 10.86 (0.00-23.73) |
|         |            | Not tested       | 56               | 3.57 (0.00-8.31) | 7.40 (0.14-14.13) | 7.40 (0.14-14.13)  |
|         | 21-29      | All              | 1174             | 2.47 (1.58-3.35) | 5.33 (4.01-6.64)  | 6.66 (5.07-8.22)   |
|         |            | HPV tested       | 1035             | 2.42 (1.48-3.35) | 4.93 (3.57-6.27)  | 6.02 (4.40-7.61)   |
|         |            | HPV +            | 953              | 2.52 (1.52-3.51) | 5.05 (3.61-6.46)  | 6.30 (4.40-8.17)   |
|         |            | HPV -            | 82               | 1.22 (0.00-3.57) | 5.02 (0.09-9.69)  | 8.97 (0.00-17.43)  |
|         |            | Not tested       | 139              | 2.88 (0.06-5.62) | 8.33 (3.48-12.93) | 11.53 (5.55-17.14) |

| Outcome    | Age (y)    | Index HPV status | n                 | 1Y                  | 3Y                  | 5Y                  |
|------------|------------|------------------|-------------------|---------------------|---------------------|---------------------|
|            |            |                  |                   | % (95% CI)          | % (95% CI)          | % (95% CI)          |
|            | 30-64      | All              | 875               | 7.20 (5.47-8.90)    | 12.24 (10.00-14.42) | 15.26 (12.68-17.77) |
|            |            | HPV tested       | 771               | 7.65 (5.76-9.51)    | 12.43 (10.02-14.77) | 15.13 (12.39-17.78) |
|            |            | HPV +            | 631               | 8.08 (5.93-10.18)   | 12.95 (10.24-15.59) | 15.32 (12.28-18.25) |
|            |            | HPV -            | 140               | 6.43 (2.28-10.41)   | 10.10 (4.94-14.99)  | 13.94 (7.67-19.79)  |
|            |            | Not tested       | 104               | 4.81 (0.61-8.83)    | 10.83 (4.56-16.68)  | 16.17 (8.18-23.46)  |
|            | 21-64      | All              | 2049              | 4.49 (3.59-5.38)    | 8.23 (7.01-9.44)    | 10.19 (8.79-11.57)  |
|            |            | HPV tested       | 1806              | 4.65 (3.67-5.62)    | 8.07 (6.78-9.35)    | 9.74 (8.29-11.18)   |
|            |            | HPV +            | 1584              | 4.73 (3.68-5.78)    | 8.13 (6.74-9.49)    | 9.57 (8.03-11.08)   |
|            |            | HPV -            | 222               | 4.05 (1.42-6.61)    | 8.21 (4.50-11.77)   | 12.15 (6.94-17.07)  |
|            |            | Not tested       | 243               | 3.29 (1.02-5.51)    | 9.40 (5.58-13.08)   | 13.57 (8.76-18.13)  |
| CIN1 alone | 21-24      | All              | 603               | 0.83 (0.10-1.55)    | 1.60 (0.55-2.63)    | 1.60 (0.55-2.63)    |
|            |            | HPV tested       | 529               | 0.76 (0.02-1.49)    | 1.36 (0.35-2.36)    | 1.36 (0.35-2.36)    |
|            |            | HPV +            | 498               | 0.80 (0.02-1.58)    | 1.24 (0.25-2.22)    | 1.24 (0.25-2.22)    |
|            |            | HPV -            | 31                | 3.23 (0.00-9.25)    | 3.23 (0.00-9.25)    | 3.23 (0.00-9.25)    |
|            |            | Not tested       | 74                | 1.35 (0.00-3.95)    | 3.32 (0.00-7.83)    | 3.32 (0.00-7.83)    |
|            | 25-29      | All              | 523               | 3.82 (2.17-5.45)    | 4.46 (2.66-6.22)    | 5.38 (3.10-7.61)    |
|            |            | HPV tested       | 468               | 3.85 (2.09-5.57)    | 4.33 (2.45-6.17)    | 5.37 (2.91-7.77)    |
|            |            | HPV +            | 418               | 4.07 (2.15-5.94)    | 4.37 (2.37-6.33)    | 4.68 (2.60-6.72)    |
|            |            | HPV -            | 50                | 2.00 (0.00-5.80)    | 4.00 (0.00-9.28)    | 10.86 (0.00-23.73)  |
|            |            | Not tested       | 55                | 3.64 (0.00-8.46)    | 5.53 (0.00-11.41)   | 5.53 (0.00-11.41)   |
| 21-29      | All        | 1126             | 2.22 (1.36-3.08)  | 2.80 (1.82-3.77)    | 3.36 (2.15-4.55)    |                     |
|            | HPV tested | 997              | 2.21 (1.29-3.11)  | 2.76 (1.72-3.78)    | 3.24 (1.97-4.50)    |                     |
|            | HPV +      | 916              | 2.29 (1.32-3.26)  | 2.67 (1.61-3.72)    | 2.81 (1.72-3.90)    |                     |
|            | HPV -      | 81               | 1.23 (0.00-3.61)  | 3.70 (0.00-7.73)    | 7.72 (0.00-15.97)   |                     |
|            | Not tested | 129              | 2.33 (0.00-4.89)  | 4.27 (0.48-7.92)    | 4.27 (0.48-7.92)    |                     |
| 30-64      | All        | 843              | 6.64 (4.95-8.31)  | 10.10 (8.01-12.15)  | 11.76 (9.43-14.03)  |                     |
|            | HPV tested | 743              | 7.00 (5.15-8.82)  | 10.08 (7.85-12.25)  | 11.75 (9.27-14.17)  |                     |
|            | HPV +      | 604              | 7.28 (5.19-9.33)  | 10.04 (7.57-12.45)  | 11.07 (8.41-13.65)  |                     |
|            | HPV -      | 139              | 6.48 (2.30-10.49) | 10.18 (4.98-15.09)  | 14.05 (7.73-19.94)  |                     |
|            | Not tested | 100              | 4.00 (0.08-7.76)  | 10.27 (4.02-16.11)  | 11.72 (4.89-18.06)  |                     |
| 21-64      | All        | 1969             | 4.06 (3.19-4.93)  | 5.88 (4.82-6.92)    | 6.80 (5.62-7.96)    |                     |
|            | HPV tested | 1740             | 4.25 (3.30-5.20)  | 5.82 (4.70-6.93)    | 6.70 (5.46-7.92)    |                     |
|            | HPV +      | 1520             | 4.28 (3.25-5.29)  | 5.52 (4.35-6.68)    | 6.10 (4.84-7.34)    |                     |
|            | HPV -      | 220              | 4.09 (1.44-6.67)  | 7.78 (4.16-11.27)   | 11.76 (6.59-16.65)  |                     |
|            | Not tested | 229              | 2.62 (0.53-4.67)  | 6.28 (3.04-9.42)    | 7.55 (3.88-11.08)   |                     |
| CIN2       | 21-24      | All              | 240               | 25.00 (19.32-30.28) | 43.50 (36.73-49.55) | 52.66 (45.37-58.98) |
|            |            | HPV tested       | 200               | 26.50 (20.12-32.37) | 43.22 (35.81-49.78) | 52.14 (44.12-59.00) |
|            |            | HPV +            | 190               | 27.37 (20.74-33.44) | 44.49 (36.82-51.23) | 50.98 (42.85-57.95) |
|            |            | HPV -            | 10                | 20.00 (0.00-41.32)  | 30.00 (0.00-53.35)  | 64.00 (13.51-85.02) |
|            |            | Not tested       | 40                | 17.50 (4.84-28.47)  | 45.34 (26.52-59.34) | 55.59 (35.18-69.57) |
|            | 25-29      | All              | 234               | 39.32 (32.72-45.26) | 59.06 (52.07-65.04) | 61.04 (53.93-67.05) |
|            |            | HPV tested       | 201               | 41.79 (34.56-48.23) | 59.03 (51.42-65.44) | 60.71 (52.96-67.19) |
|            |            | HPV +            | 192               | 43.23 (35.77-49.82) | 60.86 (53.07-67.37) | 69.37 (50.68-80.98) |
|            |            | HPV -            | 9                 | 22.22 (0.00-45.15)  | 22.22 (0.00-45.15)  | 35.19 (0.00-60.69)  |
|            |            | Not tested       | 33                | 24.24 (8.11-37.54)  | 57.58 (36.87-71.49) | 60.84 (39.96-74.46) |

| Outcome | Age (y)    | Index HPV status | n                   | 1Y                  | 3Y                  | 5Y                  |
|---------|------------|------------------|---------------------|---------------------|---------------------|---------------------|
|         |            |                  |                     | % (95% CI)          | % (95% CI)          | % (95% CI)          |
|         | 21-29      | All              | 474                 | 32.07 (27.73-36.14) | 50.89 (46.07-55.27) | 56.74 (51.75-61.22) |
|         |            | HPV tested       | 401                 | 34.16 (29.36-38.65) | 50.77 (45.53-55.51) | 56.45 (50.99-61.31) |
|         |            | HPV +            | 382                 | 35.34 (30.36-39.96) | 52.31 (46.92-57.16) | 56.38 (50.83-61.30) |
|         |            | HPV -            | 19                  | 15.79 (0.00-30.69)  | 26.32 (3.60-43.68)  | 49.82 (19.93-68.56) |
|         |            | Not tested       | 73                  | 20.55 (10.72-29.30) | 51.01 (37.71-61.47) | 57.66 (44.00-67.99) |
|         | 30-64      | All              | 314                 | 46.50 (40.69-51.74) | 62.64 (56.80-67.70) | 71.76 (65.67-76.77) |
|         |            | HPV tested       | 268                 | 48.51 (42.16-54.16) | 63.09 (56.74-68.50) | 70.06 (63.42-75.50) |
|         |            | HPV +            | 247                 | 52.63 (45.98-58.47) | 66.33 (59.79-71.80) | 72.64 (65.67-78.20) |
|         |            | HPV -            | 21                  | 5.00 (0.00-14.09)   | 25.00 (3.41-41.77)  | 52.73 (16.01-73.39) |
|         |            | Not tested       | 46                  | 36.96 (21.34-49.47) | 59.88 (42.51-72.00) | 79.27 (61.32-88.89) |
|         | 21-64      | All              | 788                 | 37.82 (34.34-41.11) | 55.60 (51.92-59.00) | 62.69 (58.88-66.14) |
|         |            | HPV tested       | 669                 | 39.91 (36.08-43.51) | 55.73 (51.74-59.40) | 61.87 (57.72-65.61) |
|         |            | HPV +            | 629                 | 42.13 (38.14-45.86) | 57.84 (53.73-61.59) | 62.63 (58.38-66.45) |
|         |            | HPV -            | 40                  | 7.57 (0.00-15.45)   | 25.54 (10.54-38.03) | 49.72 (29.38-64.20) |
|         |            | Not tested       | 119                 | 26.05 (17.73-33.53) | 54.41 (44.28-62.70) | 66.18 (55.72-74.17) |
| CIN2+   | 21-24      | All              | 338                 | 28.40 (23.43-33.05) | 48.60 (42.87-53.74) | 59.62 (53.45-64.98) |
|         |            | HPV tested       | 274                 | 31.02 (25.32-36.29) | 48.61 (42.24-54.28) | 58.48 (51.61-64.37) |
|         |            | HPV +            | 260                 | 32.31 (26.38-37.76) | 50.11 (43.53-55.92) | 58.01 (50.97-64.05) |
|         |            | HPV -            | 14                  | 14.29 (0.00-30.79)  | 28.57 (0.52-48.71)  | 59.18 (21.65-78.74) |
|         |            | Not tested       | 64                  | 18.75 (8.60-27.77)  | 48.52 (34.28-59.67) | 64.19 (48.27-75.22) |
|         | 25-29      | All              | 335                 | 40.90 (35.39-45.93) | 62.40 (56.70-67.34) | 66.74 (61.01-71.62) |
|         |            | HPV tested       | 286                 | 43.01 (36.97-48.47) | 62.77 (56.57-68.09) | 67.15 (60.88-72.42) |
|         |            | HPV +            | 273                 | 44.69 (38.47-50.28) | 64.76 (58.43-70.13) | 69.58 (62.38-75.40) |
|         |            | HPV -            | 13                  | 15.38 (0.00-32.89)  | 31.62 (0.33-53.09)  | 50.14 (10.78-72.14) |
|         |            | Not tested       | 49                  | 28.57 (14.73-40.16) | 59.18 (42.82-70.87) | 63.38 (47.02-74.69) |
|         | 21-29      | All              | 673                 | 34.62 (30.93-38.12) | 55.26 (51.27-58.93) | 63.11 (58.99-66.82) |
|         |            | HPV tested       | 560                 | 37.14 (33.01-41.02) | 55.58 (51.19-59.58) | 62.90 (58.35-66.96) |
|         |            | HPV +            | 533                 | 38.65 (34.37-42.65) | 57.32 (52.82-61.40) | 63.00 (58.35-67.12) |
|         |            | HPV -            | 27                  | 11.11 (0.00-22.21)  | 26.11 (7.44-41.02)  | 55.06 (30.34-71.01) |
|         |            | Not tested       | 113                 | 22.12 (14.08-29.41) | 53.21 (42.87-61.68) | 63.35 (52.60-71.66) |
| 30-64   | All        | 484              | 44.83 (40.22-49.09) | 61.02 (56.35-65.19) | 71.33 (66.54-75.44) |                     |
|         | HPV tested | 414              | 46.14 (41.11-50.73) | 61.47 (56.41-65.95) | 70.19 (64.97-74.63) |                     |
|         | HPV +      | 377              | 50.66 (45.35-55.46) | 65.28 (60.04-69.83) | 73.81 (68.37-78.32) |                     |
|         | HPV -      | 37               | 2.70 (0.00-7.79)    | 22.53 (7.47-35.15)  | 41.07 (19.48-56.86) |                     |
|         | Not tested | 70               | 37.14 (24.74-47.50) | 58.38 (44.75-68.64) | 76.54 (62.67-85.25) |                     |
| 21-64   | All        | 1157             | 38.89 (36.02-41.64) | 57.69 (54.69-60.49) | 66.55 (63.47-69.37) |                     |
|         | HPV tested | 974              | 40.97 (37.79-43.97) | 58.10 (54.83-61.13) | 66.00 (62.63-69.07) |                     |
|         | HPV +      | 910              | 43.63 (40.31-46.76) | 60.63 (57.27-63.74) | 67.43 (63.96-70.57) |                     |
|         | HPV -      | 64               | 4.69 (0.00-9.73)    | 23.99 (12.62-33.89) | 46.59 (31.47-58.38) |                     |
|         | Not tested | 183              | 27.87 (21.07-34.08) | 55.16 (47.20-61.92) | 68.51 (60.33-75.00) |                     |
| CIN3+   | 21-24      | All              | 126                 | 35.71 (26.78-43.56) | 65.00 (55.46-72.49) | 79.51 (69.61-86.18) |
|         |            | HPV tested       | 98                  | 41.84 (31.20-50.83) | 66.21 (55.20-74.51) | 78.81 (67.44-86.21) |
|         |            | HPV +            | 94                  | 43.62 (32.65-52.80) | 68.00 (56.79-76.30) | 80.37 (68.47-87.78) |
|         |            | HPV -            | 4                   | 25.00 (0.00-57.41)  | 50.00 (0.00-81.23)  | 50.00 (0.00-81.23)  |
|         |            | Not tested       | 28                  | 17.86 (2.37-30.89)  | 60.71 (37.74-75.21) | 83.37 (51.97-94.24) |

| Outcome | Age (y) | Index HPV status | n     | 1Y                  | 3Y                  | 5Y                  |
|---------|---------|------------------|-------|---------------------|---------------------|---------------------|
|         |         |                  |       | % (95% CI)          | % (95% CI)          | % (95% CI)          |
|         |         | All              | 125   | 46.40 (36.90-54.47) | 71.57 (62.22-78.60) | 81.23 (71.66-87.57) |
|         |         | HPV tested       | 107   | 46.73 (36.38-55.39) | 72.46 (62.24-79.92) | 82.93 (72.31-89.48) |
|         | 25-29   | HPV +            | 103   | 48.54 (37.93-57.34) | 74.36 (64.02-81.73) | 82.66 (71.86-89.32) |
|         |         | HPV -            | 4     | 25.00 (0.00-57.41)  | 62.50 (0.00-91.61)  | 100.00 (-)          |
|         |         | Not tested       | 18    | 44.44 (16.02-63.25) | 66.67 (35.94-82.66) | 72.22 (41.49-86.81) |
|         |         | All              | 251   | 40.64 (34.24-46.41) | 68.26 (61.84-73.61) | 78.97 (72.76-83.76) |
|         |         | HPV tested       | 205   | 43.90 (36.68-50.30) | 69.44 (62.27-75.25) | 79.40 (72.50-84.57) |
|         | 21-29   | HPV +            | 197   | 45.69 (38.26-52.21) | 71.29 (64.03-77.08) | 79.82 (72.79-85.03) |
|         |         | HPV -            | 8     | 12.50 (0.00-32.66)  | 40.00 (0.00-66.85)  | 70.00 (5.67-90.46)  |
|         |         | Not tested       | 46    | 26.09 (12.24-37.75) | 63.04 (46.10-74.66) | 77.54 (59.38-87.58) |
|         |         | All              | 201   | 43.78 (36.49-50.24) | 61.68 (54.19-67.94) | 73.47 (65.91-79.35) |
|         |         | HPV tested       | 170   | 44.12 (36.13-51.10) | 61.50 (53.30-68.26) | 73.19 (64.82-79.56) |
|         | 30-64   | HPV +            | 154   | 48.70 (40.17-56.02) | 65.89 (57.35-72.71) | 78.06 (69.45-84.25) |
|         |         | HPV -            | 16    | 6.25 (0.00-17.39)   | 19.23 (0.00-36.64)  | 45.48 (0.00-71.52)  |
|         |         | Not tested       | 31    | 41.94 (21.69-56.95) | 62.61 (40.42-76.53) | 74.36 (51.57-86.43) |
|         |         | All              | 452   | 41.81 (37.08-46.19) | 65.40 (60.64-69.59) | 76.56 (71.92-80.44) |
|         |         | HPV tested       | 375   | 43.73 (38.48-48.54) | 65.86 (60.60-70.42) | 76.56 (71.42-80.77) |
|         | 21-64   | HPV +            | 351   | 46.72 (41.24-51.70) | 68.93 (63.57-73.49) | 79.02 (73.82-83.19) |
|         |         | HPV -            | 24    | 4.17 (0.00-11.84)   | 21.25 (2.82-36.18)  | 51.00 (18.73-70.46) |
|         |         | Not tested       | 77    | 32.47 (21.16-42.16) | 62.91 (50.26-72.34) | 76.15 (63.26-84.51) |
|         |         | All              | 4396  | 2.30 (1.85-2.74)    | 4.09 (3.49-4.69)    | 5.13 (4.41-5.84)    |
|         |         | HPV tested       | 3424  | 2.60 (2.06-3.13)    | 4.27 (3.58-4.96)    | 5.20 (4.39-5.99)    |
|         | 21-24   | HPV +            | 2349  | 3.75 (2.98-4.51)    | 6.05 (5.06-7.03)    | 7.08 (5.96-8.18)    |
|         |         | HPV -            | 1075  | 0.19 (0.00-0.46)    | 0.52 (0.06-0.98)    | 1.11 (0.37-1.84)    |
|         |         | Not tested       | 972   | 1.34 (0.61-2.06)    | 3.46 (2.25-4.66)    | 4.96 (3.37-6.52)    |
|         |         | All              | 4000  | 3.98 (3.37-4.58)    | 5.94 (5.19-6.68)    | 6.52 (5.72-7.32)    |
|         |         | HPV tested       | 3214  | 4.42 (3.71-5.13)    | 6.32 (5.47-7.17)    | 6.91 (5.99-7.82)    |
|         | 25-29   | HPV +            | 1860  | 7.53 (6.32-8.72)    | 10.65 (9.22-12.06)  | 11.54 (9.95-13.11)  |
|         |         | HPV -            | 1354  | 0.15 (0.00-0.35)    | 0.48 (0.09-0.86)    | 0.95 (0.26-1.63)    |
|         |         | Not tested       | 786   | 2.16 (1.14-3.17)    | 4.37 (2.90-5.83)    | 4.89 (3.31-6.45)    |
|         |         | All              | 8396  | 3.10 (2.73-3.47)    | 4.96 (4.48-5.43)    | 5.74 (5.21-6.27)    |
|         |         | HPV tested       | 6638  | 3.48 (3.04-3.92)    | 5.25 (4.70-5.79)    | 5.97 (5.37-6.57)    |
|         | 21-29   | HPV +            | 4209  | 5.42 (4.73-6.10)    | 8.06 (7.22-8.89)    | 8.92 (8.02-9.81)    |
|         |         | HPV -            | 2429  | 0.12 (0.00-0.26)    | 0.44 (0.17-0.71)    | 1.02 (0.51-1.52)    |
|         |         | Not tested       | 1758  | 1.65 (1.05-2.24)    | 3.87 (2.93-4.80)    | 4.89 (3.78-5.99)    |
|         |         | All              | 12281 | 2.35 (2.08-2.61)    | 3.37 (3.05-3.70)    | 3.98 (3.61-4.34)    |
|         |         | HPV tested       | 10010 | 2.57 (2.26-2.88)    | 3.56 (3.19-3.93)    | 4.11 (3.70-4.52)    |
|         | 30-64   | HPV +            | 2970  | 8.35 (7.35-9.34)    | 11.13 (9.97-12.27)  | 12.59 (11.32-13.84) |
|         |         | HPV -            | 7040  | 0.14 (0.05-0.23)    | 0.39 (0.24-0.55)    | 0.62 (0.40-0.83)    |
|         |         | Not tested       | 2271  | 1.37 (0.89-1.84)    | 2.54 (1.87-3.20)    | 3.39 (2.57-4.21)    |
|         |         | All              | 20677 | 2.65 (2.43-2.87)    | 4.01 (3.74-4.29)    | 4.69 (4.39-5.00)    |
|         |         | HPV tested       | 16648 | 2.93 (2.67-3.19)    | 4.23 (3.92-4.54)    | 4.85 (4.51-5.19)    |
|         | 21-64   | HPV +            | 7179  | 6.63 (6.05-7.20)    | 9.33 (8.64-10.01)   | 10.44 (9.69-11.17)  |
|         |         | HPV -            | 9469  | 0.13 (0.06-0.20)    | 0.39 (0.26-0.52)    | 0.68 (0.49-0.87)    |
|         |         | Not tested       | 4029  | 1.49 (1.11-1.86)    | 3.11 (2.56-3.66)    | 4.04 (3.37-4.70)    |

**eTable 4. Estimated percentage (Kaplan-Meier) of women with one or more biopsies (biopsy alone, ECC alone or both together, excluding LEEP) within five years after an ASCUS cytology screening result by age and HPV testing status**

| <b>Age (y)</b> | <b>Index HPV Status</b> | <b>n</b> | <b>5Y percentage (95% CI)</b> |
|----------------|-------------------------|----------|-------------------------------|
| 21-24          | All                     | 4396     | 37.15 (35.62-38.64)           |
|                | HPV tested              | 3424     | 40.72 (38.96-42.42)           |
|                | HPV positive            | 2349     | 54.20 (52.05-56.26)           |
|                | HPV negative            | 1075     | 11.29 (9.09-13.44)            |
|                | Not tested              | 972      | 24.49 (21.52-27.35)           |
| 25-29          | All                     | 4000     | 36.22 (34.67-37.74)           |
|                | HPV tested              | 3214     | 39.72 (37.95-41.44)           |
|                | HPV positive            | 1860     | 61.10 (58.76-63.31)           |
|                | HPV negative            | 1354     | 10.38 (8.58-12.14)            |
|                | Not tested              | 786      | 22.23 (19.12-25.22)           |
| 21-29          | All                     | 8396     | 36.69 (35.60-37.76)           |
|                | HPV tested              | 6638     | 40.22 (38.98-41.44)           |
|                | HPV positive            | 4209     | 57.25 (55.67-58.77)           |
|                | HPV negative            | 2429     | 10.76 (9.38-12.13)            |
|                | Not tested              | 1758     | 23.45 (21.31-25.53)           |
| 30-39          | All                     | 4817     | 29.69 (28.33-31.02)           |
|                | HPV tested              | 3945     | 31.88 (30.35-33.37)           |
|                | HPV positive            | 1555     | 65.63 (63.09-67.99)           |
|                | HPV negative            | 2390     | 10.09 (8.74-11.42)            |
|                | Not tested              | 872      | 19.75 (16.91-22.49)           |
| 40-49          | All                     | 4096     | 25.17 (23.76-26.55)           |
|                | HPV tested              | 3340     | 25.88 (24.31-27.42)           |
|                | HPV positive            | 802      | 64.83 (61.22-68.11)           |
|                | HPV negative            | 2538     | 13.61 (12.15-15.04)           |
|                | Not tested              | 756      | 22.31 (19.09-25.41)           |
| 50-64          | All                     | 3368     | 18.93 (17.53-20.31)           |
|                | HPV tested              | 2725     | 20.33 (18.73-21.91)           |
|                | HPV positive            | 613      | 54.82 (50.58-58.70)           |
|                | HPV negative            | 2112     | 10.34 (8.90-11.75)            |
|                | Not tested              | 643      | 12.99 (10.27-15.62)           |
| 30-64          | All                     | 12281    | 25.21 (24.40-26.00)           |
|                | HPV tested              | 10010    | 26.71 (25.80-27.61)           |
|                | HPV positive            | 2970     | 63.19 (61.34-64.94)           |
|                | HPV negative            | 7040     | 11.40 (10.58-12.21)           |
|                | Not tested              | 2271     | 18.65 (16.95-20.32)           |
| 21-64          | All                     | 20677    | 29.85 (29.20-30.50)           |
|                | HPV tested              | 16648    | 32.08 (31.33-32.81)           |
|                | HPV positive            | 7179     | 59.66 (58.47-60.82)           |
|                | HPV negative            | 9469     | 11.21 (10.51-11.90)           |
|                | Not tested              | 4029     | 20.65 (19.32-21.95)           |



**eTable 5. Kaplan-Meier estimate of proportion with no follow-up test (Pap, HPV, Biopsy, ECC or LEEP) within five years of an ASC-US cytology screening test by age and HPV testing status**

| <b>Age (y)</b> | <b>Index HPV Status</b> | <b>n</b> | <b>% without test (95% CI)</b> |
|----------------|-------------------------|----------|--------------------------------|
| 21-24          | All                     | 4396     | 15.96 (14.86-17.14)            |
|                | HPV tested              | 3424     | 14.07 (12.87-15.37)            |
|                | HPV +                   | 2349     | 12.00 (10.70-13.46)            |
|                | HPV -                   | 1075     | 18.57 (16.16-21.33)            |
|                | Not tested              | 972      | 22.45 (19.94-25.28)            |
| 25-29          | All                     | 4000     | 15.29 (14.18-16.48)            |
|                | HPV tested              | 3214     | 13.74 (12.55-15.05)            |
|                | HPV +                   | 1860     | 9.17 (7.91-10.63)              |
|                | HPV -                   | 1354     | 20.05 (17.92-22.43)            |
|                | Not tested              | 786      | 21.51 (18.79-24.63)            |
| 21-29          | All                     | 8396     | 15.62 (14.83-16.46)            |
|                | HPV tested              | 6638     | 13.90 (13.04-14.81)            |
|                | HPV +                   | 4209     | 10.74 (9.81-11.77)             |
|                | HPV -                   | 2429     | 19.37 (17.73-21.15)            |
|                | Not tested              | 1758     | 22.01 (20.13-24.07)            |
| 30-64          | All                     | 12281    | 17.89 (17.21-18.61)            |
|                | HPV tested              | 10010    | 17.32 (16.56-18.10)            |
|                | HPV +                   | 2970     | 10.34 (9.27-11.54)             |
|                | HPV -                   | 7040     | 20.26 (19.30-21.26)            |
|                | Not tested              | 2271     | 20.44 (18.81-22.20)            |
| 21-64          | All                     | 20677    | 16.97 (16.45-17.51)            |
|                | HPV tested              | 16648    | 15.95 (15.38-16.54)            |
|                | HPV +                   | 7179     | 10.58 (9.87-11.35)             |
|                | HPV -                   | 9469     | 20.02 (19.19-20.89)            |
|                | Not tested              | 4029     | 21.12 (19.88-22.45)            |

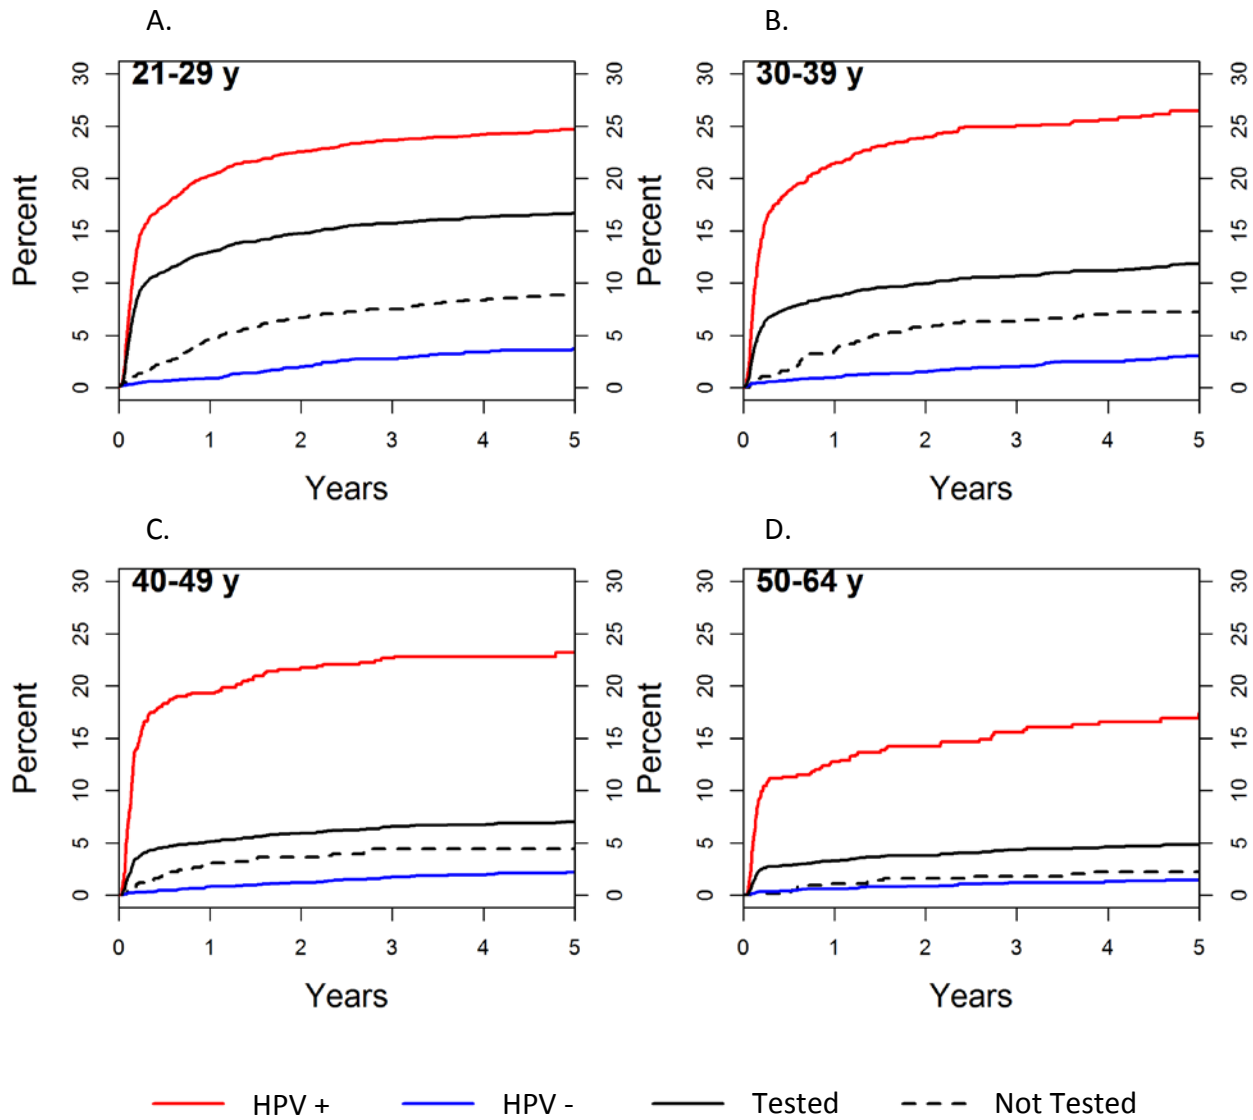

eFigure 1. Cumulative Incidence of CIN1 after ASC-US by Age and Index HPV test Status

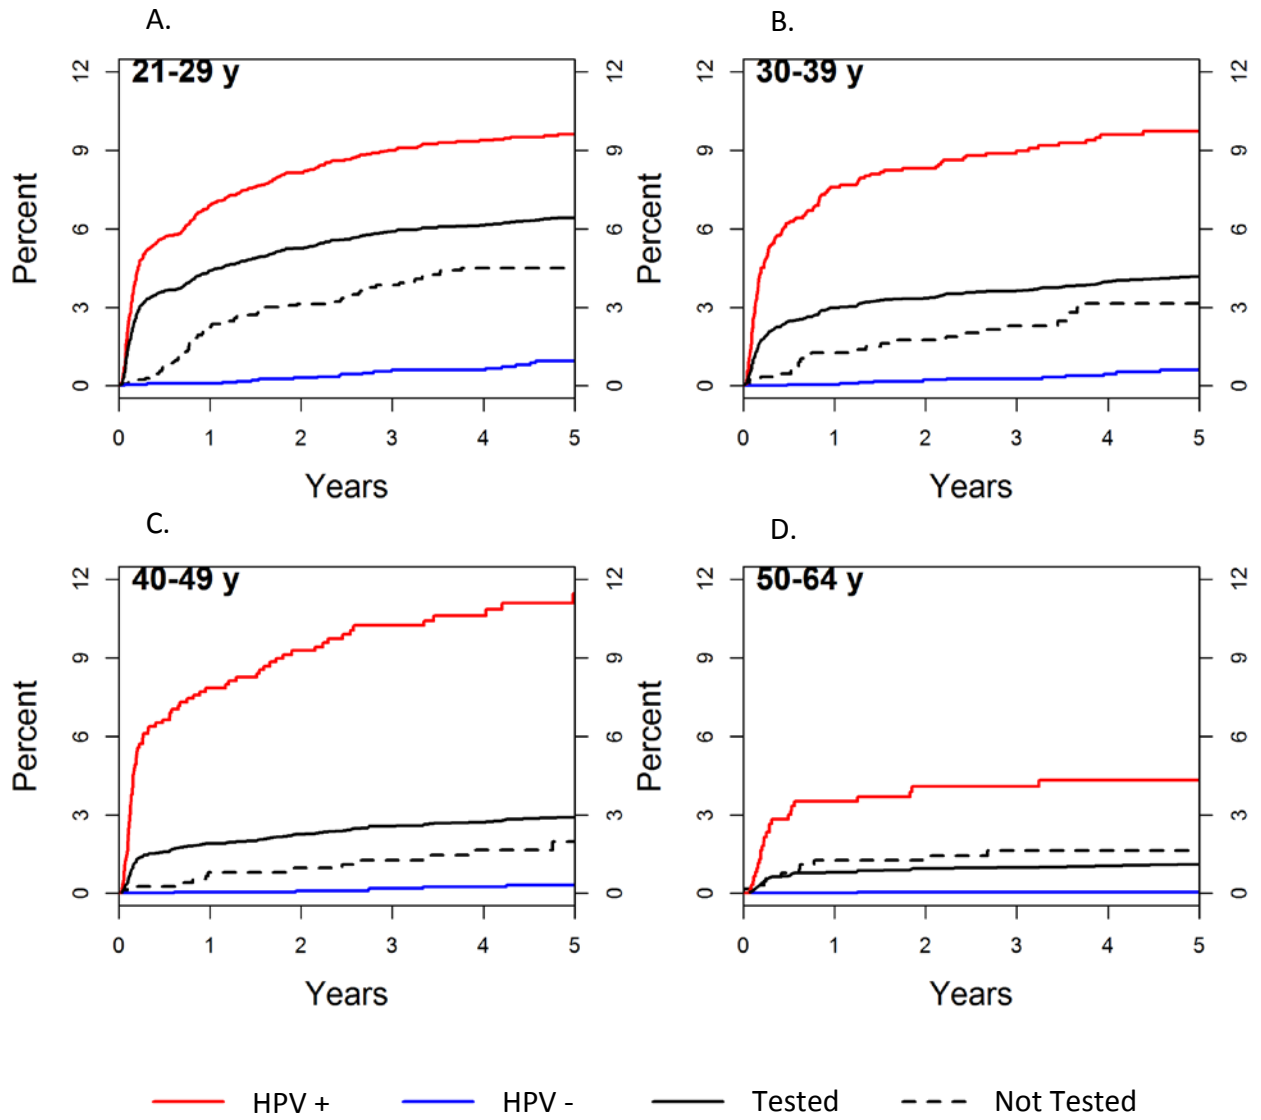

eFigure 2. Cumulative Incidence of CIN2 after ASC-US by Age and Index HPV test Status

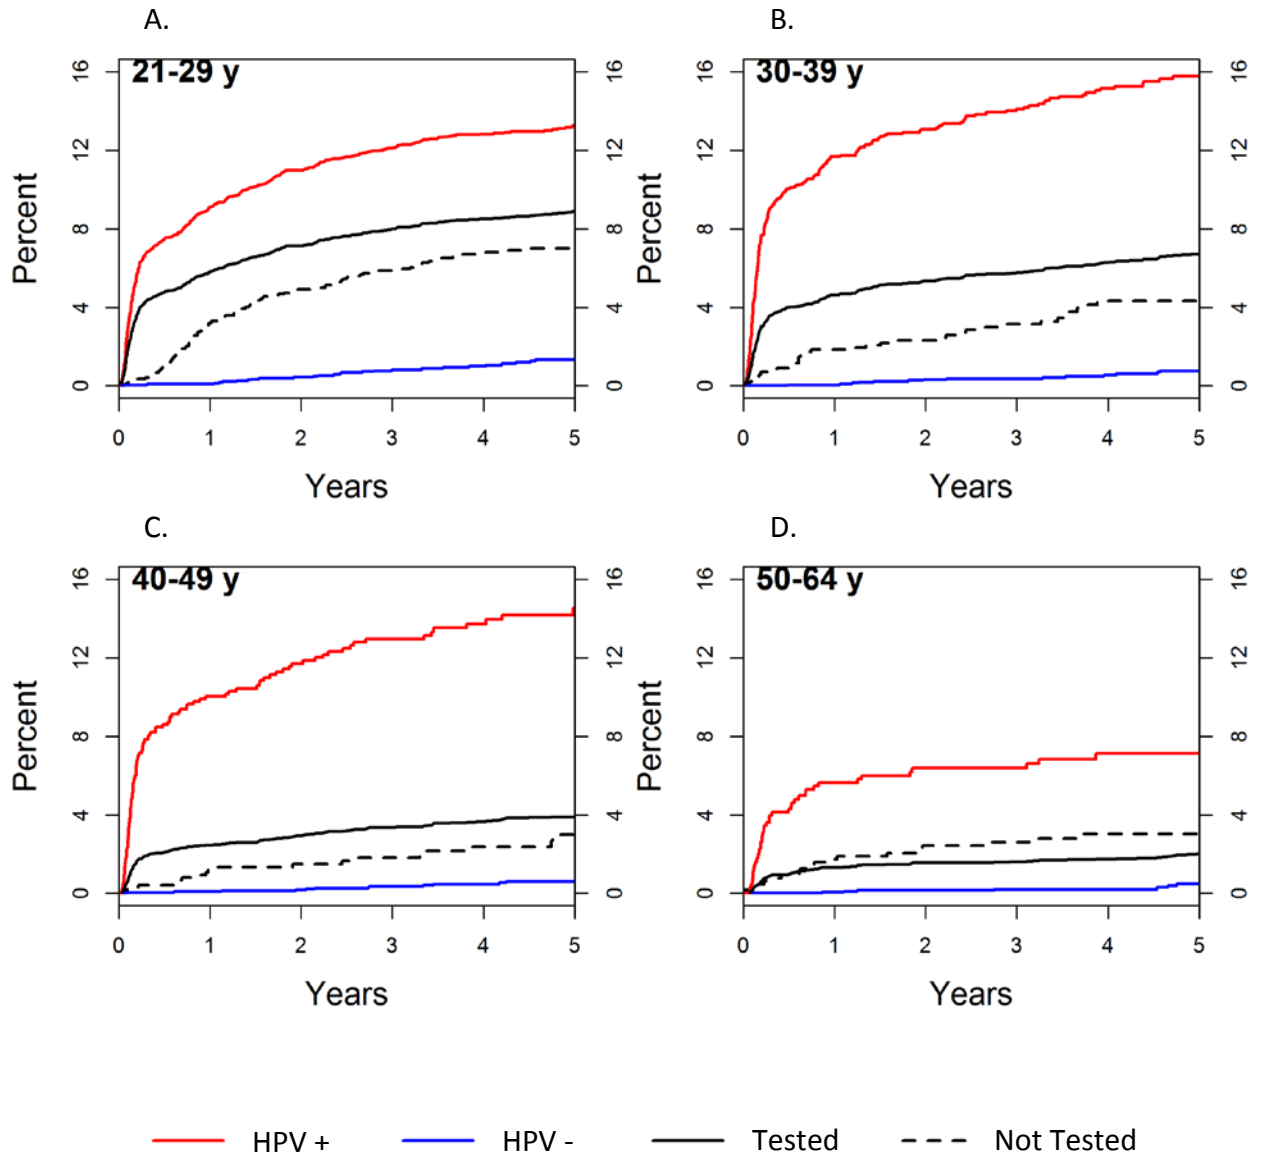

eFigure 3. Cumulative Incidence of CIN2+ after ASC-US by Age and Index HPV test Status

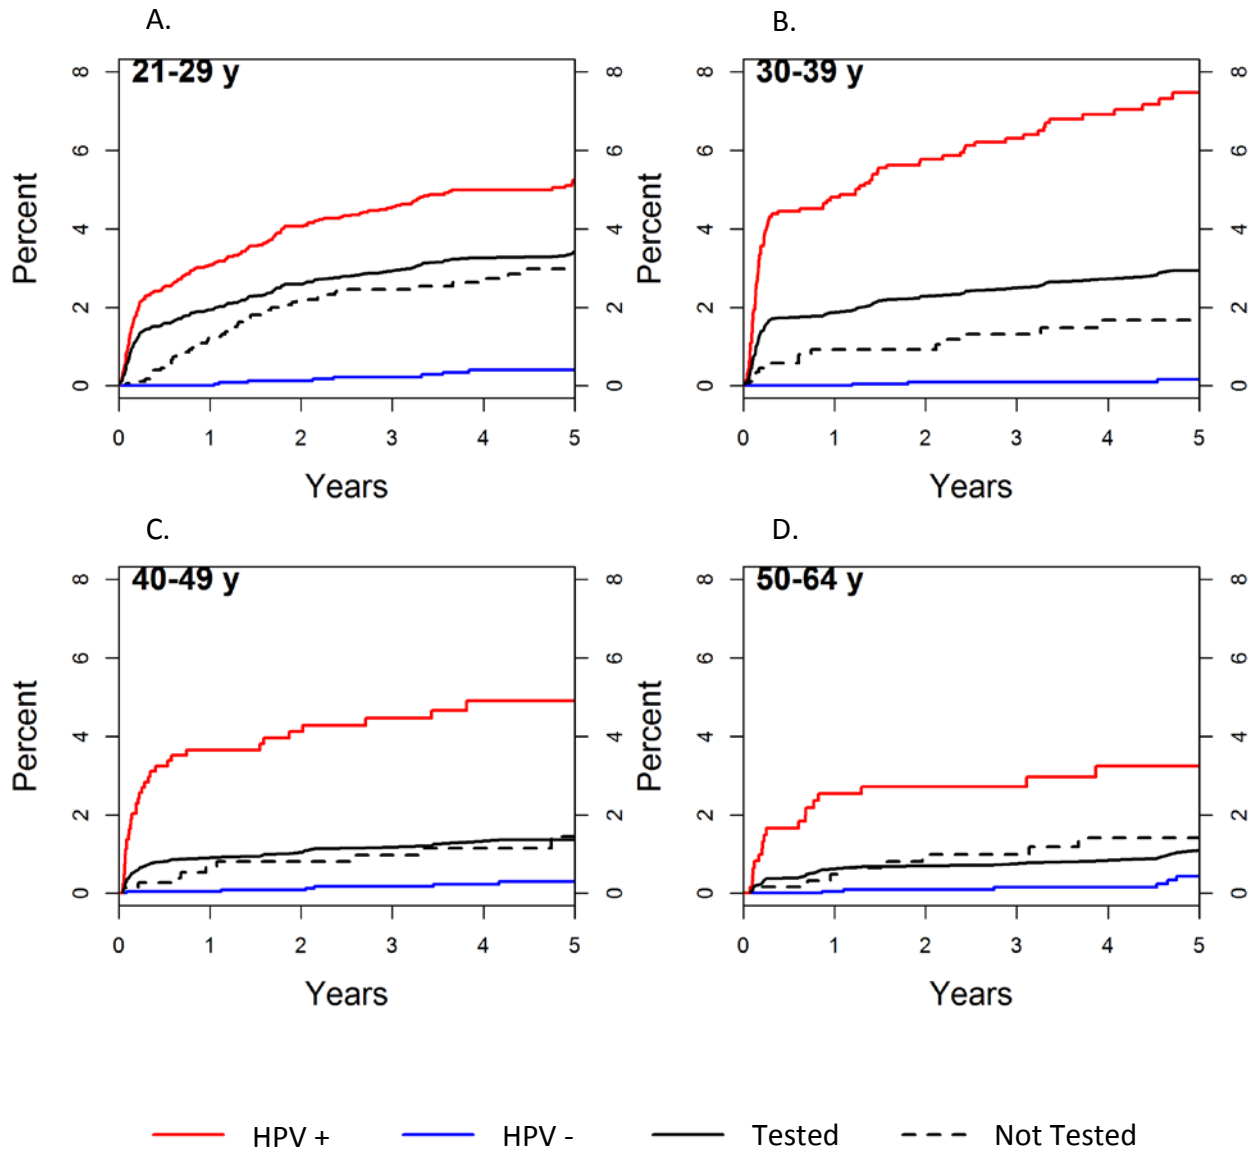

eFigure 4. Cumulative Incidence of CIN3+ after ASC-US by Age and Index HPV test Status

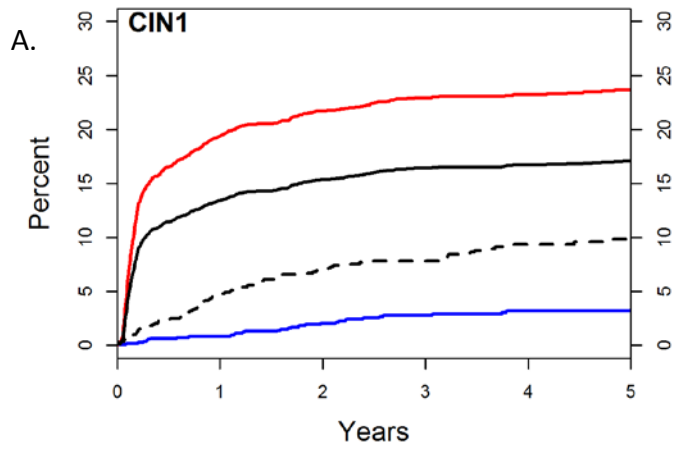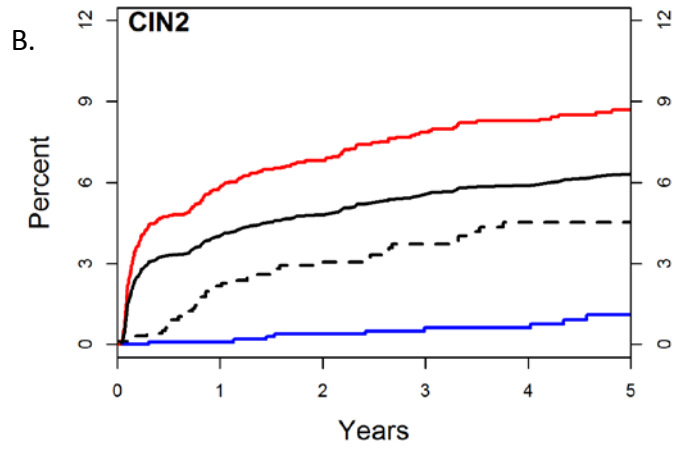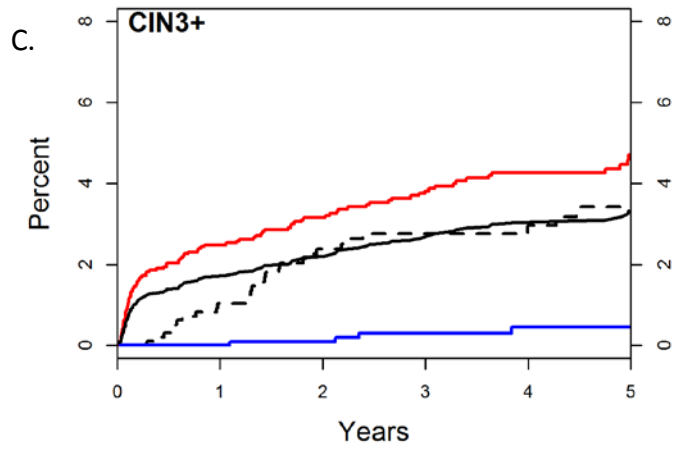

— HPV +    — HPV -    — Tested    - - - Not Tested

eFigure 5. Cumulative Incidence of CIN1, CIN2 and CIN3+ after ASC-US by Index HPV test Status for women aged 21-24 years

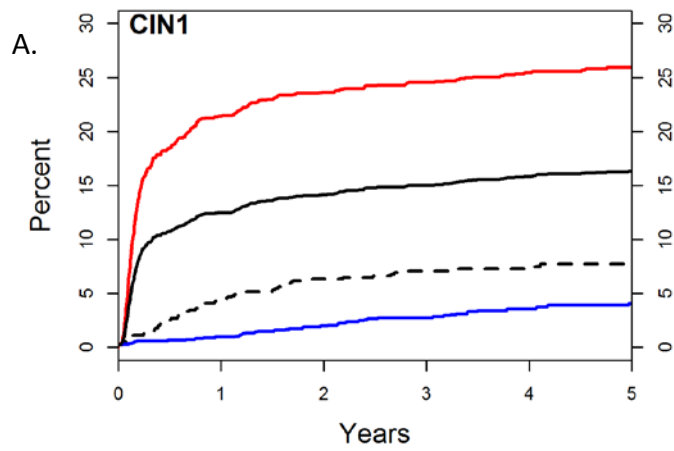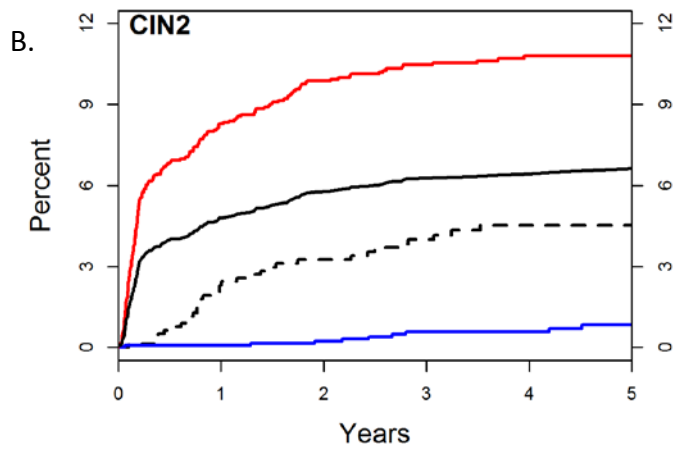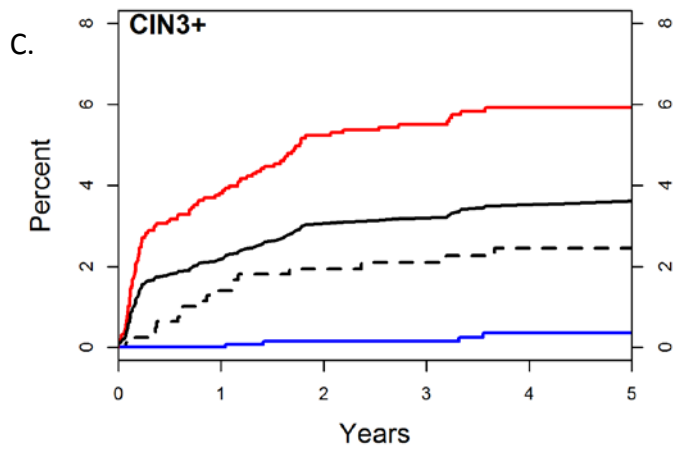

— HPV +    — HPV -    — Tested    - - - Not Tested

eFigure 6. Cumulative Incidence of CIN1, CIN2 and CIN3+ after ASC-US by Index HPV test Status for women aged 25-29 years
